# Supplementary material
Source: publisher site journal article supplement (https://www.dovepress.com/article/308852)
Supplement: Supplementary file 1 [file get_supplementary_file.php]

**Title:** Case-Ascertainment Models to Identify Adults with Obstructive Sleep Apnea Using Health Administrative Data: Internal and External Validation

**Authors:** Tetyana Kendzerska, Carl Van Walraven, Daniel I. McIsaac, Marcus Povitz, Sunita Mulpuru, Isac Lima1, Robert Talarico, Shawn D. Aaron, William Reisman, Andrea S. Gershon

**e-Text**

**e-Text 1.** Characteristics of sleep databases utilized in the current study.

**e-Text 2.** The list and detailed definitions on candidate variables considered in a case-ascertainment model to identify individuals with obstructive sleep apnea using provincial health administrative data.

**e-Tables**

**e-Table 1:** The distribution of cohort characteristics by primary definitions of the OSA status in the derivation and internal validation cohort (the Ottawa Hospital Sleep Database).

**e-Table 2:** The distribution of cohort characteristics by secondary definitions of the OSA status in the derivation and internal validation cohort (the Ottawa Hospital Sleep Database).

**e-Table 3**: The distribution of cohort characteristics by primary definitions of the OSA status in the external validation cohort (the London Health Sciences Centre Sleep and Apnea Assessment Unit PSG database).

**e-Table 4:** The distribution of cohort characteristics by secondary definitions of the OSA status in the external validation cohort (the London Health Sciences Centre Sleep and Apnea Assessment Unit PSG database).

**e-Table 5:** Variables considered in the parsimonious models derived from the Ottawa Hospital Sleep Database utilizing the classification and regression tree (CART) methods.

**e-Table 6:** Descriptions of the classification and regression tree (CRAT) models for primary definitions of OSA status.

**e-Table 7:** Estimates from logistic regression models utilizing variables derived from the classification and regression tree (CART) models and from full logistic regression models (on the Ottawa Hospital Sleep Database).

**e-Table 8:** Calibration coefficients for external validation.

**e-Table 9:** The sensitivity and specificity with 95% confidence interval for the separate variables to be considered in a statistical model to identify individuals with mild to severe obstructive sleep apnea (OSA) (AHI≥5).

**e-Table 10:** The sensitivity and specificity with 95% confidence interval for the separate variables to be considered in a statistical model to identify individuals with mild to severe obstructive sleep apnea (OSA) with and excessive daytime sleepiness (AHI≥5&ESS≥13).

**e-Table 11**: Internal (the Ottawa Hospital Sleep Database) and external (the London Health Sciences Centre Sleep and Apnea Assessment Unit PSG database) validation measures of CARTs and logistic regression models developed to identify individuals with mild to severe obstructive sleep apnea (OSA) with or without excessive daytime sleepiness.

**e-Table 12**. Internal (the Ottawa Hospital Sleep Database) and external (the London Health Sciences Centre Sleep and Apnea Assessment Unit PSG database) validation measures of CARTs and logistic regression models developed to identify individuals with moderate to severe or severe obstructive sleep apnea (OSA) for subgroups.

**e-Table 13:** Measurement properties associated with different OSA probability threshold for moderate to severe OSA (parsimonious logistic model) on the external cohort.

**e-Figures**

**e-Figure 1.** Health care pattern for individuals with suspected obstructive sleep apnea.

**e-Figure 2.** External validation: Calibration plots to classify individuals with mild to severe OSA regardless or with excessive daytime sleepiness for the parsimonious classification regression tree (CART) or logistic regression model: parsimonious CART model for the AHI≥5; parsimonious logistic regression model for the AHI≥5; full logistic regression model for the AHI≥5 and ESS≥13; and full logistic regression model for the AHI≥5.

**e-References**

**e-Text 1. Characteristics of sleep databases utilized in the current study.**

| **Sleep database** | **PSG recording software use*/ Scoring criteria / N included** | **Hypopnea criteria** | **Data collection** |
| --- | --- | --- | --- |
| **London Health Sciences Centre Sleep Apnea Assessment Unit PSG database (London, Ontario)**  All consecutive individuals who underwent Level 1 in-hospital diagnostic polysomnography (PSG) at the London Health Sciences Centre between 2007 and 2015 | Software: Natus SD3200 with Mdrive  Scoring: the American Academy of Sleep Medicine (AASM) criteria 20071 and 20122  N=12,672 (4,086 by 2012 criteria) | 2007 criteria: ≥30% decrease in flow from baseline with an associated oxygen desaturation of ≥4%  2012 criteria: ≥30% decrease in flow from baseline with an associated oxygen desaturation of ≥3% OR an associated arousal | Automatically collected information by Embla Sandman Elite sleep diagnostic software (Sandman® Elite™) |
| **The Ottawa Hospital (TOH) Sleep database**  **(Ottawa, Ontario)**  All consecutive individuals who underwent Level 1 in-hospital PSG at the TOH between 2015 and 2017 | Software:Sandman 10.1  Scoring: the AASM criteria 20122  N=4,816 | ≥30% decrease in flow from baseline with an associated oxygen desaturation of ≥3% OR an associated arousal | We first identified all consecutive adults who underwent a diagnostic sleep study in the TOH Sleep Center from April 2015 to April 2017 using available data from the TOH Data Warehouse, a hospital-level administrative database. A text-search algorithm developed by the TOH Data Warehouse was applied to the PSG reports creating a population of people with known OSA status. We verified the accuracy of key indices from PSG recordings against manual chart review as a reference standard through a random sampling of 200 PSG recordings. Given that information on PSG indices of interest was numeric and available in the MS Word document format in a very structured way, we achieved 100% accuracy in identifying OSA status. |

*Each patient in the cohort underwent full in-laboratory polysomnography recording that was scored by a sleep technologist and reviewed by a sleep physician.

**e-Text 2.** The list and detailed definitions on candidate variables considered in a case-ascertainment model to identify individuals with obstructive sleep apnea using provincial health administrative data (N=39).

|  | **Candidate variables** | **Definitions from health administrative data** |
| --- | --- | --- |
|  | **Demographics at the date of the index sleep study** | |
| 1 | Sex | from RPDB |
| 2 | Age# | from RPDB |
| 3 | Rural location | Defined using patient’s postal code3. |
| 4 | Neighbourhood Income Quintile | Ontario neighbourhoods are classified into one of the five approximately equal-sized income quintiles, ranked from poorest (Q1) to wealthiest (Q5) and these have been shown to be related to population health status and health care utilization4. Each patient was assigned to the income quintile based on the patient’s postal code at the time of baseline and Statistics Canada’s Postal Code Conversion File5,6. |
|  | **Prevalent comorbidities at the date of the index sleep study** | |
| 5 | Adenoid or/and tonsillectomy | from OHIP: S063; S065  from CIHI: 1.FR.87; 1.FR.89 |
| 6 | Asthma | From Ontario Asthma database7 (ICES-derived disease-specific databases) |
| 7 | CHF | From Congestive Heart Failure database8 (ICES-derived disease-specific databases) |
| 8 | COPD | From Chronic Obstructive Pulmonary Disease (COPD) database9 (ICES-derived disease-specific databases) |
| 9 | Diabetes | From Ontario Diabetes database10 (ICES-derived disease-specific databases) |
| 10 | Hypertension | From Ontario Hypertension database11 (ICES-derived disease-specific databases) |
| 11 | Myocardial Infarction | From Ontario Myocardial Infarction database12 (ICES-derived disease-specific databases) |
|  | **Events within the 3-year prior to the index sleep study** | |
| 12 | Inpatients and outpatients’ codes for OSA diagnoses | - from OHIP: 307; 786 - from CIHI/DAD/SDS: ICD-10 codes: G4730, G4731, G4738; Intervention: 1GZ31CBND |
| 13 | Outpatient OSA visit with a physician registered with ADP | if an outpatient visit defined from OHIP was with a specialist registered with ADP |
| 14 | Outpatient OSA visit with a specialist physician | if an outpatient visit defined from OHIP was with a specialist physician of interest from IPDB: MAINSPECIALTY = “INTERNAL MEDICINE”, “NEUROLOGY”, “OTOLARYNGOLOGY”, “PSYCHIATRY”, “RESPIROLOGY” |
| 15 | Surgical procedures for OSA | - MMA/UPPP (from CIHI/DAD/ SDS): Using the Canadian Classification of Health Interventions (CCI) codes: 1EE79, 1FQ78LA - Bariatric surgery (from OHIP/CIHI): In-patient Bariatric Procedures: ICD-10-CA: E66 AND CCI codes: 1NF78; Outpatient bariatric procedures: OHIP FEECODES: S120, S114, S189 |
| 16 | PAP treatment | from ADP database (www.ontario.ca/page/assistive-devices-program); APAP/ CPAP/ Bilevel therapy13 |
| 17 | A prior sleep study (any) | from OHIP: OHIP FEECODES: J696, J896; J690, J890; J689, J889; J697, J897; J898; J899; J990; J895, J695 |
| 18 | Inpatient hospitalizations for other sleep disorders* | from CIHI/DAD/SDS: ICD-10 codes: G470, G471, G478, G479, F510, F511 |
|  |  |  |
| 19 | COPD hospitalization | from CIHI/DAD (Elixhauser comorbidity index14)  ICD-10 Codes: I27.8, I27.9, J40.x–J47.x, J60.x–J67.x, J68.4, J70.1, J70.3 |
| 20 | Depression (hospitalization or outpatient visit) | - From CIHI/DAD: ICD-10 F20.4, F31.3–F31.5, F32.x, F33.x, F34.1, F41.2, F43.2 - OHIP diagnostic codes: 311 or 300 - From the OMHRS admission dataset: 296.2, 296.3, 296.5, 300.4, 309.0, 309.28, 311 |
| 21 | Arrhythmia hospitalization | from CIHI/DAD  ICD-10 code: I44.1–I44.3, I45.6, I45.9, I47.x–I49.x, R00.0, R00.1, R00.8, T82.1, Z45.0, Z95.0 |
| 22 | Cancer hospitalization | ICD-10 codes: C00-26; C30 - C34; C37 - C41; C43; C45 - C58; C60 - C76; C77 – C80;C81 - C85; C88; C90 - C97 |
| 23 | Cardiovascular disease hospitalization | from CIHI/DAD (Elixhauser comorbidity index14), ICD-10 codes  Heart failure: I09.9, I11.0, I13.0, I13.2, I25.5, I42.0, I42.5– I42.9, I43.x, I50.x, P29.0  Myocardial infarction: I21.x, I22.x, I25.2  Cerebra-vascular disease: I60-69, G45-46, H34  Cardiac valvular disease: A52.0, I05.x–I08.x, I09.1, I09.8, I34.x–I39.x, Q23.0–Q23.3, Z95.2– Z95.4  Disease of pulmonary circulation: I26.x, I27.x, I28.0, I28.8, I28.9  Peripheral vascular disease: I70; I71; I73.1; I73.8; I73.9; I77.1; I79.0; I79.2; K55.1; K55.8; K55.9; Z95.8; Z95.9 |
| 24 | Charlson comorbidity index | Charlson comorbidity index14 (not age-sex standardized) |
| 25 | Diabetes hospitalization | from CIHI/DAD (Elixhauser comorbidity index14), ICD 10 Codes   - Diabetes with complications: E10.2–E10.8, E11.2–E11.8, E12.2–E12.8, E13.2–E13.8, E14.2–E14.8 - Diabetes without complications: E10.0, E10.1, E10.9, E11.0, E11.1, E11.9, E12.0, E12.1, E12.9, E13.0, E13.1, E13.9, E14.0, E14.1, E14.9 |
| 26 | Hypertension hospitalization | from CIHI/DAD (Elixhauser comorbidity index14), ICD 10 Codes   - Hypertension with complications: I11.x–I13.x, I15.x - Hypertension without complications: I10.x |
| 27 | Obesity hospitalization | from CIHI/DAD/SDS, ICD 10 Codes   - Obesity hypoventilation syndrome: E662 - Obesity: E66.x |
| 28 | Substance use disorder hospitalization* | from CIHI/DAD, ICD 10 Codes   - Alcohol use disorder: F10, E52, G62.1, I42.6, K29.2, K70.0, K70.3, K70.9, T51.x, Z50.2, Z71.4, Z72.1 - Drug use disorder: F11.x–F16.x, F18.x, F19.x, Z71.5, Z72.2 |
| 29 | Hypothyroid hospitalization* | from CIHI/DAD: ICD-10 codes: E00.x–E03.x, E89.0 |
| 30 | Dementia hospitalization* | from CIHI/DAD: ICD-10 codes: F00 - F03, F05.1, G30, G31.1 |
| 31 | Liver disease hospitalization* | from CIHI/DAD: ICD-10 codes B18; K70.0 - K70.3; K70.9; K71.3 - K71.5; K71.7; K73; K74; K76.0; K76.2 - K76.4; K76.8; K76.9; Z94.4; I85.0; I85.9; I86.4; I98.2; K70.4; K71.1; K72.1; K72.9; K76.5; K76.6; K76.7 |
| 32 | Hospitalization with chronic renal disease OR History of dialysis* | from CIHI/DAD:   - Chronic renal disease ICD-10 codes: I12.0. I13.1N03.2-3.7, N05.2-5.7, N18-19, N25.0, Z49.0-49.2, Z94.0, Z99.2 - History of dialysis: OHIP fee codes: R849; G323; G326; G330; G331; G332; G333; G860; G861; G862; G863; G864; G865; G866; R850; G325; CCI codes: PZ21HQBR, 1PZ21HPD4; CCP codes 51.95, 66.98 |
|  | **Events within 1-year follow-up since the index sleep study** | |
| 33 | Inpatients and outpatients’ codes for OSA diagnoses | - from OHIP: 307; 786 - from CIHI/DAD/SDS: ICD-10 codes: G4730, G4731, G4738; Intervention: 1GZ31CBND |
| 34 | Outpatient OSA visit with a specialist physician | if an outpatient visit defined from OHIP was with a specialist physician of interest from IPDB: MAINSPECIALTY = “INTERNAL MEDICINE”, “NEUROLOGY”, “OTOLARYNGOLOGY”, “PSYCHIATRY”, “RESPIROLOGY” |
| 35 | PAP treatment | from ADP database (www.ontario.ca/page/assistive-devices-program); APAP/ CPAP/ Bilevel therapy |
| 36 | Surgical procedures for OSA | - MMA/UPPP (from CIHI/DAD/ SDS): Using the Canadian Classification of Health Interventions (CCI) codes: 1EE79, 1FQ78LA   Bariatric surgery (from OHIP/CIHI): In-patient Bariatric Procedures: ICD-10-CA: E66 AND CCI codes: 1NF78; Outpatient bariatric procedures: OHIP FEECODES: S120, S114, S189 |
| 37 | A repeated sleep study (any) | from OHIP: OHIP FEECODES: J696, J896; J690, J890; J689, J889; J697, J897; J898; J899; J990; J895, J695 |
| 38 | Outpatient OSA visit with a physician registered with ADP | if an outpatient visit defined from OHIP was with a specialist registered with ADP |
| 39 | Supplemental oxygen use* | from ADP database (www.ontario.ca/page/assistive-devices-program) |

*****excluded due to a prevalence of ≤0.5% in the sleep cohort used for the internal validation15

# Age variable was transformed for the logistic regression model: a 3-knot restricted cubic spline was used

ADP, Assistive Devices Program Database; APAP, automatic positive airway pressure; BiPAP, Bilevel Positive Airway Pressure; CIHI/DAD/SDS, Canadian Institute for Health Information Discharge Abstract Database (information on all acute care hospitalization in Canada) and the Same Day Surgery; CPAP, continuous positive airway pressure; IPDB, Institute for Clinical Evaluative Sciences Physician Database; MMA, maxilla­mandibular advancement; ODD, Ontario Diabetes Dataset; OHIP, Ontario Health Insurance Plan Physician Services Claims Database; SES, socioeconomic status; RPDB, Registered Persons Database; UPPP, uvulopalatopharyngoplasty.

**e-Table 1:** The distribution of cohort characteristics by primary definitions of the OSA status in the derivation and internal validation cohort (the Ottawa Hospital Sleep Database).

|  | **OSA Cases (AHI ≥15)** | | **OSA Cases (AHI >30)** | |
| --- | --- | --- | --- | --- |
| **Variable** | **No (AHI<15)** | **Yes (AHI ≥15)** | **No (AHI≤30)** | **Yes (AHI >30)** |
| **N** | **N=3,435** | **N=1,664** | **N=4,456** | **N=643** |
| **Demographics at the date of the index sleep study** | | | | |
| Age, years, median (IQR) | 47 (36-57) | 55 (45-65) | 49 (38-59) | 56 (46-66) |
| Male, n (%) | 1,6535 (47.6) | 1,084 (65.1) | 2,267 (50.9) | 452 (70.3) |
| Rural location | 230 (6.7) | 130 (7.8) | 310 (70) | 50 (7.8) |
| Neighbourhood Income Quintile |  |  |  |  |
| Q 1 | 490 (14.3) | 225 (13.5) | 618 (13.9) | 97 (15.1) |
| Q 2 | 623 (18.1) | 312 (18.8) | 802 (18.0) | 133 (20.7) |
| Q 3 | 663 (19.3) | 315 (18.9) | 869 (19.5) | 109 (17.0) |
| Q 4 | 865 (25.2) | 416 (25.0) | 1,120 (25.1) | 151 (25.0) |
| Q 5 | 777 (22.6) | 394 (23.7) | 1,030 (23.1) | 141 (21.9) |
| **Prevalent comorbidities at the date of the index sleep study**, n (%) | | | | |
| Adenoid or/and tonsillectomy | 106 (3.1) | 27 (1.6) | 126 (2.8) | 7 (1.1) |
| Asthma | 818 (23.8) | 302 (18.1) | 1,007 (22.6) | 113 (17.6) |
| CHF | 81 (2.4) | 113 (6.8) | 137 (3.1) | 57 (8.9) |
| COPD | 343 (10.0) | 203 (12.2) | 469 (10.5) | 77 (12) |
| Diabetes | 397 (11.6) | 377 (22.7) | 589 (13.2) | 185 (22.8) |
| Hypertension | 863 (25.1) | 753 (45.3) | 1,294 (29.0) | 332 (50.1) |
| Myocardial Infarction | 53 (1.5) | 64 (3.8) | 87 (2.0) | 30 (4.7) |
| **Events within the 3-year prior to the index sleep study**, n (%) | | | | |
| Inpatients and outpatients’ codes for OSA diagnoses | 1,269 (36.9) | 715 (43.0) | 1,710 (38.4) | 274 (42.6) |
| Outpatient OSA visit with a physician registered with ADP | 602 (17.5) | 342 (20.6) | 813 (18.2) | 131 (20.4) |
| Outpatient OSA visit with a specialist physician* | 458 (13.3) | 270 (16.2) | 621 (13.9) | 107 (16.6) |
| Surgical procedures for OSA# | 23 (0.7) | 7 (0.4) | 28 (0.6) | 2 (0.3) |
| PAP treatment | 24 (0.7) | 11 (0.7) | 32 (0.7) | 3 (0.5) |
| A prior sleep study | 118 (3.4) | 53 (3.2) | 157 (3.5) | 14 (2.2) |
| Depression (hospitalization or outpatient visit) | 1,554 (45.2) | 600 (36.1) | 1,929 (43.3) | 225 (35.0) |
| COPD hospitalizations | 49 (1.4%) | 24 (1.4%) | 67 (1.5%) | 6 (0.9%) |
| Arrhythmia hospitalizations | 59 (1.7) | 66 (4.0) | 89 (2.0) | 36 (5.6) |
| Cancer hospitalizations | 41 (1.2) | 41 (2.5) | 62 (1.4) | 20 (3.1) |
| Cardiovascular disease hospitalizations | 93 (2.7) | 105 (6.3) | 148 (3.3) | 50 (7.8) |
| Charlson comorbidity index | 251 (7.3) | 247 (14.8) | 386 (8.7) | 112 (17.4) |
| Diabetes hospitalizations | 115 (3.3) | 143 (8.6) | 191 (4.3) | 67 (10.4) |
| Hypertension hospitalizations | 96 (2.8) | 126 (7.6) | 172 (3.9) | 50 (7.8) |
| Obesity hospitalizations | 39 (1.1) | 24 (1.4) | 55 (1.2) | 8 (1.2) |
| **Events within 1-year follow-up since the index sleep study**, n(%) | | | | |
| Inpatients and outpatients’ codes for OSA diagnoses | 1,476 (43.0) | 1,395 (83.8) | 2,313 (51.9) | 558 (86.8) |
| Outpatient OSA visit with a specialist physician* | 1,202 (35.0) | 1,341 (80.6) | 2,005 (45.0) | 538 (83.7) |
| Outpatient OSA visit with a physician registered with ADP | 1,233 (35.9) | 1,343 (80.7) | 2,035 (45.7) | 541 (84.1) |
| PAP treatment | 283 (8.2) | 769 (46.2) | 705 (15.8) | 347 (54.0) |
| Surgical procedures for OSA# | 27 (0.8) | 25 (1.5) | 41 (0.9) | 11 (1.7) |
| A repeated sleep study | 347 (10.1) | 878 (52.8) | 826 (18.5) | 399 (62.1) |

The percentages are col percentages; may not sum to 100% due to missing values (<0.5%)

ADP, assistive device program; AHI, apnea-hypopnea index; BMI, body mass index; ESS, the Epworth Sleepiness Scale; OSA, obstructive sleep apnea; PAP, positive airway pressure treatment

*an OSA relevant specialty (OSA billing physician specialty more frequently associated with a sleep medicine scope of practice): internal medicine, respirology, neurology, otolaryngology or psychiatry

#Surgical procedures for OSA: maxillomandibular advancement surgery, uvulopalato-pharyngoplasty, tonsillectomy and/or adenoidectomy or bariatric surgery

**e-Table 2:** The distribution of cohort characteristics by secondary definitions of the OSA status in the derivation and internal validation cohort (the Ottawa Hospital Sleep Database).

|  | **OSA Cases (AHI ≥5)** | | **OSA Cases (AHI ≥5&ESS≥13)** | |
| --- | --- | --- | --- | --- |
| **Variable** | **No (AHI<5)** | **Yes (AHI ≥5)** | **No (AHI<5&ESS<13)** | **Yes (AHI ≥5&ESS≥13)** |
| **N** | **1,883** | **3,266** | **4,471** | **628** |
| **Demographics at the date of the index sleep study** | | | | |
| Age, years, median (IQR) | 44 (33-55) | 53 (43-63) | 50 (38-60) | 50 (41-59) |
| Male, n (%) | 725 (39.6) | 1,994 (61.1) | 2,347 (52.5) | 372 (59.2) |
| Rural location | 122 (6.7) | 238 (7.3) | 299 (6.7) | 61 (9.7) |
| Neighbourhood Income Quintile |  |  |  |  |
| Q 1 | 232 (12.7) | 483 (14.8) | 599 (13.4) | 116 (18.5) |
| Q 2 | 352 (19.2) | 583 (17.9) | 821 (18.4) | 114 (18.2) |
| Q 3 | 348 (19.0) | 630 (19.3) | 848 (19.0) | 130 (20.7) |
| Q 4 | 458 (25.0) | 823 (25.2) | 1,129 (25.3) | 152 (24.2) |
| Q 5 | 434 (23.7) | 737 (22.6) | 1,058 (23.7) | 113 (18.0) |
| **Prevalent comorbidities at the date of the index sleep study**, n (%) | | | | |
| Adenoid or/and tonsillectomy | 65 (3.5) | 68 (2.1) | 122 (2.7) | 11 (1.8) |
| Asthma | 449 (24.5) | 671 (20.5) | 990 (22.1) | 130 (20.7) |
| CHF | 33 (1.8) | 161 (4.9) | 166 (3.7) | 28 (4.5) |
| COPD | 166 (9.1) | 380 (11.6) | 479 (10.7) | 67 (10.7) |
| Diabetes | 172 (9.4) | 602 (18.4) | 662 (14.8) | 112 (17.8) |
| Hypertension | 349 (19.0) | 1,267 (38.8) | 1,406 (31.4) | 210 (33.4) |
| Myocardial Infarction | 18 (1.0) | 99 (3.0) | 102 (2.3) | 15 (2.4) |
| **Events within the 3-year prior to the index sleep study**, n (%) | | | | |
| Inpatients and outpatients’ codes for OSA diagnoses | 668 (36.4) | 1,316 (40.3) | 1,736 (38.8) | 248 (39.5) |
| Outpatient OSA visit with a physician registered with ADP | 306 (16.7) | 638 (19.5) | 822 (18.4) | 122 (19.4) |
| Outpatient OSA visit with a specialist physician* | 230 (12.5) | 498 (15.2) | 639 (14.3) | 89 (14.2) |
| Surgical procedures for OSA# | 14 (0.8) | 16 (0.5) | 30 (0.7) | 0 (0.0) |
| PAP treatment | 10 (0.5) | 25 (0.8) | 33 (0.7) | 2 (0.3) |
| A prior sleep study | 69 (3.8) | 102 (3.1) | 160 (3.6) | 11 (1.8) |
| Depression (hospitalization or outpatient visit) | 881 (48.1) | 1,273 (39.0) | 1,877 (42.0) | 277 (44.1) |
| COPD hospitalizations | 24 (1.3) | 49 (1.5) | 65 (1.5) | 8 (1.3) |
| Arrhythmia hospitalizations | 24 (1.3) | 101 (3.1) | 105 (2.3) | 20 (3.2) |
| Cancer hospitalizations | 17 (0.9) | 65 (2.0) | 73 (1.6) | 9 (1.4) |
| Cardiovascular disease hospitalizations | 37 (2.0) | 161 (4.9) | 170 (3.8) | 28 (4.5) |
| Charlson comorbidity index | 107 (5.8) | 391 (12.0) | 430 (9.6) | 68 (10.8) |
| Diabetes hospitalizations | 51 (2.8) | 207 (6.3) | 219 (4.9) | 39 (6.2) |
| Hypertension hospitalizations | 37 (2.0) | 185 (5.7) | 190 (4.2) | 32 (5.1) |
| Obesity hospitalizations | 22 (1.2) | 41 (1.3) | 63 (1.4) | 0 (0.0) |
| **Events within 1-year follow-up since the index sleep study**, n(%) | | | | |
| Inpatients and outpatients’ codes for OSA diagnoses | 534 (29.1) | 2,337 (71.6) | 2,364 (52.9) | 507 (80.7) |
| Outpatient OSA visit with a specialist physician* | 381 (20.8) | 2,162 (66.2) | 2,062 (46.1) | 481 (76.6) |
| Outpatient OSA visit with a physician registered with ADP | 390 (21.3) | 2,186 (66.9) | 2,091 (46.8) | 485 (77.2) |
| PAP treatment | 41 (2.2) | 1,011 (31.0) | 802 (17.9) | 250 (39.8) |
| Surgical procedures for OSA# | 8 (0.4) | 44 (1.3) | 48 (1.1) | 4 (0.6) |
| A repeated sleep study | 40 (2.2) | 1,185 (36.3) | 935 (20.9) | 290 (46.2) |

The percentages are col percentages; may not sum to 100% due to missing values (<0.5%)

ADP, assistive device program; AHI, apnea-hypopnea index; BMI, body mass index; ESS, the Epworth Sleepiness Scale; OSA, obstructive sleep apnea; PAP, positive airway pressure treatment

*an OSA relevant specialty (OSA billing physician specialty more frequently associated with a sleep medicine scope of practice): internal medicine, respirology, neurology, otolaryngology or psychiatry

#Surgical procedures for OSA: maxillomandibular advancement surgery, uvulopalato-pharyngoplasty, tonsillectomy and/or adenoidectomy or bariatric surgery

**e-Table 3**: The distribution of cohort characteristics by primary definitions of the OSA status in the external validation cohort (the London Health Sciences Centre Sleep and Apnea Assessment Unit PSG database).

|  | **OSA Cases (AHI ≥15)** | | **OSA Cases (AHI >30)** | |
| --- | --- | --- | --- | --- |
| **Variable** | **No (AHI<15)** | **Yes (AHI ≥15)** | **No (AHI≤30)** | **Yes (AHI >30)** |
| **N** | N=7,480 | N=6,006 | N=10,117 | N=3,369 |
| **Demographics at the date of the index sleep study** | | | | |
| Age, years, median (IQR) | 49 (39-58) | 54 (45-63) | 50 (40-59) | 55 (45-64) |
| Male, n (%) | 3,804 (50.9) | 4,243 (70.6) | 5,540 (54.8) | 2,507 (74.4) |
| Rural location | 1,219 (16.3) | 1,018 (16.9) | 1,643 (16.2) | 594 (17.6) |
| Neighbourhood Income Quintile |  |  |  |  |
| Q 1 | 1,290 (17.2) | 1,031 (17.2) | 1,717 (17.0) | 604 (17.9) |
| Q 2 | 1,400 (18.7) | 1,234 (20.5) | 1,938 (19.2) | 696 (20.7) |
| Q 3 | 1,499 (20.0) | 1,193 (19.9) | 2,030 (20.1) | 662 (19.6) |
| Q 4 | 1,564 (20.9) | 1,258 (20.9) | 2,095 (20.7) | 727 (21.6) |
| Q 5 | 1,686 (22.5) | 1,268 (21.1) | 2,285 (22.6) | 669 (19.9) |
| **Prevalent comorbidities at the date of the index sleep study**, n (%) | | | | |
| Adenoid or/and tonsillectomy | 195 (2.6) | 72 (1.2) | 230 (2.3) | 37 (1.1) |
| Asthma | 1,391 (18.6) | 886 (14.8) | 1,791 (17.7) | 486 (14.4) |
| CHF | 256 (3.4) | 408 (6.8) | 383 (3.8) | 281 (8.3) |
| COPD | 795 (10.6) | 875 (14.6) | 1,151 (11.4) | 519 (15.4) |
| Diabetes | 1,124 (15.0) | 1,399 (23.3) | 1,638 (16.2) | 885 (26.3) |
| Hypertension | 2,592 (34.7) | 3,147 (52.4) | 3,838 (37.9) | 1,901 (56.4) |
| Myocardial Infarction | 151 (2.0) | 251 (4.2) | 256 (2.5) | 146 (4.3) |
| **Events within the 3-year prior to the index sleep study**, n (%) | | | | |
| Inpatients and outpatients’ codes for OSA diagnoses | 3,610 (48.3) | 2,570 (42.8) | 4,704 (46.5) | 1,476 (43.8) |
| Outpatient OSA visit with a physician registered with ADP | 2,548 (34.1) | 1,683 (28.0) | 3,269 (32.3) | 962 (28.6) |
| Outpatient OSA visit with a specialist physician* | 1,705 (22.8) | 1,018 (16.9) | 2,154 (21.3) | 569 (16.9) |
| Surgical procedures for OSA# | 51 (0.7) | 34 (0.6) | 74 (0.7) | 11 (0.3) |
| PAP treatment | 107 (1.4) | 62 (1.0) | 134 (1.3) | 35 (1.0) |
| A prior sleep study | 518 (6.9) | 209 (3.5) | 632 (6.2) | 95 (2.8) |
| Depression (hospitalization or outpatient visit) | 3,250 (43.4) | 2,137 (35.6) | 4,229 (41.8) | 1,158 (34.4) |
| COPD hospitalizations | 151 (2.0) | 172 (2.9) | 215 (2.1) | 108 (3.2) |
| Arrhythmia hospitalizations | 135 (1.8) | 237 (3.9) | 215 (2.1) | 157 (4.7) |
| Cancer hospitalizations | 96 (1.3) | 114 (1.9) | 134 (1.3) | 76 (2.3) |
| Cardiovascular disease hospitalizations | 254 (3.4) | 438 (7.3) | 399 (3.9) | 293 (8.7) |
| Charlson comorbidity index | 744 (9.9) | 1,014 (16.9) | 1,102 (10.9) | 656 (19.5) |
| Diabetes hospitalizations | 389 (5.2) | 559 (9.3) | 572 (5.7) | 376 (11.2) |
| Hypertension hospitalizations | 365 (4.9) | 543 (9.0) | 550 (5.4) | 358 (10.6) |
| Obesity hospitalizations | 119 (1.6) | 171 (2.8) | 173 (1.7) | 117 (3.5) |
| **Events within 1-year follow-up since the index sleep study**, n(%) | | | | |
| Inpatients and outpatients’ codes for OSA diagnoses | 7,429 (99.3) | 5,985 (99.7) | 10,053 (99.4) | 3,361 (99.8) |
| Outpatient OSA visit with a specialist physician* | 6,437 (86.1) | 5,533 (92.1) | 8,815 (87.1) | 3,155 (93.6) |
| Outpatient OSA visit with a physician registered with ADP | 7,423 (99.2) | 5,982 (99.6) | 10,044 (99.3) | 3,361 (99.8) |
| PAP treatment | 692 (9.3) | 2,989 (49.8) | 1,579 (15.6) | 2,102 (62.4) |
| Surgical procedures for OSA# | 70 (0.9) | 61 (1.0) | 97 (1.0) | 34 (1.0) |
| A repeated sleep study | 599 (8.0) | 2,626 (43.7) | 1,591 (15.7) | 1,634 (48.5) |

The percentages are col percentages; may not sum to 100% due to missing values (<0.5%)

ADP, assistive device program; AHI, apnea-hypopnea index; BMI, body mass index; ESS, the Epworth Sleepiness Scale; OSA, obstructive sleep apnea; PAP, positive airway pressure treatment

*an OSA relevant specialty (OSA billing physician specialty more frequently associated with a sleep medicine scope of practice): internal medicine, respirology, neurology, otolaryngology or psychiatry

#Surgical procedures for OSA: maxillomandibular advancement surgery, uvulopalato-pharyngoplasty, tonsillectomy and/or adenoidectomy or bariatric surgery

**e-Table 4:** The distribution of cohort characteristics by secondary definitions of the OSA status in the external validation cohort (the London Health Sciences Centre Sleep and Apnea Assessment Unit PSG database).

|  | **OSA Cases (AHI ≥5)** | | **OSA Cases (AHI ≥5&ESS≥13)** | |
| --- | --- | --- | --- | --- |
| **Variable** | **No (AHI<5)** | **Yes (AHI ≥5)** | **No (AHI<5&ESS<13)** | **Yes (AHI ≥5&ESS≥13)** |
| **N** | N=3,799 | N=9,687 | N=11,240 | N=2,246 |
| **Demographics at the date of the index sleep study** | | | | |
| Age, years, median (IQR) | 46 (35-55) | 53 (44-62) | 51 (41-60) | 52 (43-60) |
| Male, n (%) | 1,690 (44.5) | 6,357 (65.6) | 6,615 (58.9) | 1,432 (63.8) |
| Rural location | 593 (15.6) | 1,644 (17.0) | 1,837 (16.3) | 400 (17.8) |
| Neighbourhood Income Quintile |  |  |  |  |
| Q 1 | 653 (17.2) | 1,668 (17.2) | 1,911 (17.0) | 410 (18.3) |
| Q 2 | 723 (19.0) | 1,911 (19.7) | 2,158 (19.2) | 476 (21.2) |
| Q 3 | 792 (20.8) | 1,900 (19.6) | 2,227 (19.8) | 465 (20.7) |
| Q 4 | 787 (20.7) | 2,035 (21.0) | 2,388 (21.2) | 434 (19.3) |
| Q 5 | 823 (21.7) | 2,131 (22.0) | 2,501 (22.3) | 453 (20.2) |
| **Prevalent comorbidities at the date of the index sleep study**, n (%) | | | | |
| Adenoid or/and tonsillectomy | 135 (3.6) | 132 (1.4) | 246 (2.2) | 21 (0.9) |
| Asthma | 790 (20.8) | 1,487 (15.4) | 1,899 (16.9) | 378 (16.8) |
| CHF | 99 (2.6) | 565 (5.8) | 547 (4.9) | 117 (5.2) |
| COPD | 348 (9.2) | 1,322 (13.6) | 1,364 (12.1) | 306 (13.6) |
| Diabetes | 476 (12.5) | 2,047 (21.1) | 2,019 (18.0) | 504 (22.4) |
| Hypertension | 1,089 (28.7) | 4,650 (48.0) | 4,686 (41.7) | 1,053 (46.9) |
| Myocardial Infarction | 49 (1.3) | 353 (3.6) | 325 (2.9) | 77 (3.4) |
| **Events within the 3-year prior to the index sleep study**, n (%) | | | | |
| Inpatients and outpatients’ codes for OSA diagnoses | 1,900 (50.0) | 4,280 (44.2) | 5,220 (46.4) | 960 (42.7) |
| Outpatient OSA visit with a physician registered with ADP | 1,362 (35.9) | 2,869 (29.6) | 3,599 (32.0) | 632 (28.1) |
| Outpatient OSA visit with a specialist physician* | 952 (25.1) | 1,771 (18.3) | 2,320 (20.6) | 403 (17.9) |
| Surgical procedures for OSA# | 19 (0.5) | 66 (0.7) | 77 (0.7) | 8 (0.4) |
| PAP treatment | 68 (1.8) | 101 (1.0) | 150 (1.3) | 19 (0.8) |
| A prior sleep study | 297 (7.8) | 430 (4.4) | 632 (5.6) | 95 (4.2) |
| Depression (hospitalization or outpatient visit) | 1,769 (46.6) | 3,618 (37.3) | 4,486 (39.9) | 901 (40.1) |
| COPD hospitalizations | 69 (1.8) | 254 (2.6) | 258 (2.3) | 65 (2.9) |
| Arrhythmia hospitalizations | 52 (1.4) | 320 (3.3) | 301 (2.7) | 71 (3.2) |
| Cancer hospitalizations | 40 (1.1) | 170 (1.8) | 180 (1.6) | 30 (1.3) |
| Cardiovascular disease hospitalizations | 107 (2.8) | 585 (6.0) | 562 (5.0) | 130 (5.8) |
| Charlson comorbidity index | 315 (8.3) | 1,443 (14.9) | 1,418 (12.6) | 340 (15.1) |
| Diabetes hospitalizations | 167 (4.4) | 781 (8.1) | 755 (6.7) | 193 (8.6) |
| Hypertension hospitalizations | 138 (3.6) | 770 (7.9) | 718 (6.4) | 190 (8.5) |
| Obesity hospitalizations | 53 (1.4) | 237 (2.4) | 233 (2.1) | 57 (2.5) |
| **Events within 1-year follow-up since the index sleep study**, n(%) | | | | |
| Inpatients and outpatients’ codes for OSA diagnoses | 3,774 (99.3) | 9,640 (99.5) | 11,182 (99.5) | 2,232 (99.4) |
| Outpatient OSA visit with a specialist physician* | 3,262 (85.9) | 8,708 (89.9) | 9,903 (88.1) | 2,067 (92.0) |
| Outpatient OSA visit with a physician registered with ADP | 3,770 (99.2) | 9,635 (99.5) | 11,174 (99.4) | 2,231 (99.3) |
| PAP treatment | 212 (5.6) | 3,469 (35.8) | 2,620 (23.3) | 1,061 (47.2) |
| Surgical procedures for OSA# | 33 (0.9) | 98 (1.0) | 108 (1.0) | 23 (1.0) |
| A repeated sleep study | 81 (2.1) | 3,144 (32.5) | 2,341 (20.8) | 884 (39.4) |

The percentages are col percentages; may not sum to 100% due to missing values (<0.5%)

ADP, assistive device program; AHI, apnea-hypopnea index; BMI, body mass index; ESS, the Epworth Sleepiness Scale; OSA, obstructive sleep apnea; PAP, positive airway pressure treatment

*an OSA relevant specialty (OSA billing physician specialty more frequently associated with a sleep medicine scope of practice): internal medicine, respirology, neurology, otolaryngology or psychiatry

#Surgical procedures for OSA: maxillomandibular advancement surgery, uvulopalato-pharyngoplasty, tonsillectomy and/or adenoidectomy or bariatric surgery

**e-Table 5:** Variables considered in the parsimonious models derived from the Ottawa Hospital Sleep Database utilizing the classification and regression tree (CART) methods.

| **Population** | **OSA definition** | **Variable Name** | **SSE-Based Relative Importance** | **SSE-Based Importance** | **# of time a variable is used in a split** |
| --- | --- | --- | --- | --- | --- |
| Total | Moderate to severe OSA (AHI≥15) | A repeated sleep study within one-year of the index sleep study | 1 | 22.1995 | 1 |
| An outpatient visit for OSA from a specialist physician* within one-year of the index sleep study | 0.5187 | 11.5152 | 1 |
| A PAP treatment claim within one-year of the index sleep study | 0.396 | 8.792 | 2 |
| Age at the index sleep study | 0.2344 | 5.2026 | 3 |
| Hypertension hospitalization in the last three years prior to the sleep study | 0.0822 | 1.8246 | 1 |
| Male sex at the index sleep study | 0.0816 | 1.8118 | 1 |
| Total | Severe OSA  (AHI >30) | A repeated sleep study within one-year of the index sleep study | 1 | 11.3646 | 1 |
| Diabetes prevalence at the index sleep study | 0.3118 | 3.5439 | 1 |
| Age at the index sleep study | 0.2707 | 3.0762 | 2 |
| A PAP treatment claim within one-year of the index sleep study | 0.2083 | 2.3678 | 1 |
| Outpatient OSA visit with a physician registered with ADP within the 3-years prior to the index sleep study | 0.1915 | 2.1768 | 1 |
| Cardiovascular disease hospitalizations | 0.158 | 1.7959 | 1 |
| Total | Mild OSA regardless of DS  (AHI≥5) | Outpatient OSA visit with a physician registered with ADP within one-year of the index sleep study | 1 | 21.1979 | 1 |
| Age at the index sleep study | 0.4823 | 10.2231 | 6 |
| A repeated sleep study within one-year of the index sleep study | 0.4788 | 10.1504 | 3 |
| Male sex at the index sleep study | 0.3613 | 7.6596 | 3 |
| A PAP treatment claim within one-year of the index sleep study | 0.264 | 5.5954 | 2 |
| Depression (hospitalization or outpatient visit) within the 3-years prior to the index sleep study | 0.1231 | 2.6092 | 2 |
| Hypertension prevalence at the index sleep study | 0.1038 | 2.2009 | 1 |
| Cancer hospitalization in the last three years prior to the sleep study | 0.0923 | 1.9558 | 1 |
| Neighbourhood income status | 0.0774 | 1.6399 | 1 |
| Hypertension hospitalization in the last three years prior to the sleep study | 0.0478 | 1.0136 | 1 |
| Male | Moderate to severe OSA (AHI≥15) | A repeated sleep study within one-year of the index sleep study | 1 | 16.0236 | 1 |
| An outpatient visit for OSA from a specialist physician* within one-year of the index sleep study | 0.5639 | 9.0352 | 1 |
| A PAP treatment claim within one-year of the index sleep study | 0.3505 | 5.6167 | 1 |
| Male | Mild OSA regardless of DS  (AHI≥5) | Outpatient OSA visit with a physician registered with ADP within one-year of the index sleep study | 1 | 13.8124 | 1 |
| A repeated sleep study within one-year of the index sleep study | 0.3549 | 4.9018 | 1 |
| Age at the index sleep study | 0.3466 | 4.7871 | 1 |
| Male | Severe OSA  (AHI >30) | A repeated sleep study within one-year of the index sleep study | 1 | 8.5597 | 1 |
| Age at the index sleep study | 0.3914 | 3.35 | 3 |
| A PAP treatment claim within one-year of the index sleep study | 0.3154 | 2.6999 | 1 |
| Obesity hospitalization in the last three years prior to the sleep study | 0.1996 | 1.7084 | 1 |
| Diabetes prevalence at the index sleep study | 0.1715 | 1.4678 | 1 |
| Female | Moderate to severe OSA (AHI≥15) | A repeated sleep study within one-year of the index sleep study | 1 | 14.4005 | 1 |
| An outpatient visit for OSA from a specialist physician* within one-year of the index sleep study | 0.4513 | 6.4987 | 1 |
| A PAP treatment claim within one-year of the index sleep study | 0.3444 | 4.9593 | 1 |
| Age at the index sleep study | 0.2063 | 2.9705 | 1 |
| Female | Mild OSA regardless of DS  (AHI≥5) | A repeated sleep study within one-year of the index sleep study | 1 | 14.0362 | 1 |
| An outpatient visit for OSA from a specialist physician* within one-year of the index sleep study | 0.6977 | 9.7931 | 1 |
| Age at the index sleep study | 0.578 | 8.113 | 3 |
| A PAP treatment claim within one-year of the index sleep study | 0.3057 | 4.2909 | 1 |
| Depression (hospitalization or outpatient visit) within the 3-years prior to the index sleep study | 0.1513 | 2.1233 | 1 |
| Inpatients and outpatients’ codes for OSA diagnoses within the 3-years prior to the index sleep study | 0.1495 | 2.0991 | 1 |
| Cancer hospitalization in the last three years prior to the sleep study | 0.1378 | 1.9344 | 1 |
| Female | Severe OSA  (AHI >30) | A repeated sleep study within one-year of the index sleep study | 1 | 6.8883 | 1 |
| Age at the index sleep study | 0.3975 | 2.738 | 1 |
| Diabetes prevalence at the index sleep study | 0.3856 | 2.6564 | 1 |
| A PAP treatment claim within one-year of the index sleep study | 0.1955 | 1.347 | 1 |
| Age 30-69 | Moderate to severe OSA (AHI≥15) | A repeated sleep study within one-year of the index sleep study | 1 | 19.7342 | 1 |
| An outpatient visit for OSA from a specialist physician* within one-year of the index sleep study | 0.5428 | 10.7117 | 1 |
| A PAP treatment claim within one-year of the index sleep study | 0.3258 | 6.4288 | 1 |
| Age 30-69 | Mild OSA regardless of DS  (AHI≥5) | An outpatient OSA visit with a physician registered with ADP within one-year of the index sleep study | 1 | 18.99 | 1 |
| A repeated sleep study within one-year of the index sleep study | 0.4983 | 9.4625 | 2 |
| Male sex at the index sleep study | 0.4037 | 7.6672 | 2 |
| Age at the index sleep study | 0.3096 | 5.8797 | 5 |
| A PAP treatment claim within one-year of the index sleep study | 0.2372 | 4.5035 | 1 |
| Hypertension prevalence at the index sleep study | 0.1423 | 2.703 | 2 |
| Neighbourhood income status | 0.1011 | 1.9195 | 1 |
| Rural location | 0.0942 | 1.788 | 1 |
| Depression (hospitalization or outpatient visit) within the 3-years prior to the index sleep study | 0.0844 | 1.6027 | 1 |
| Arrhythmia hospitalization in the last three years prior to the sleep study | 0.0651 | 1.2354 | 1 |
| Age 30-69 | Severe OSA  (AHI >30) | A repeated sleep study within one-year of the index sleep study | 1 | 9.6826 | 1 |
| A PAP treatment claim within one-year of the index sleep study | 0.5817 | 5.6321 | 2 |
| Age at the index sleep study | 0.3816 | 3.6952 | 5 |
| Male sex at the index sleep study | 0.2496 | 2.4167 | 2 |
| Diabetes prevalence at the index sleep study | 0.2251 | 2.1792 | 1 |
| COPD prevalence at the index sleep study | 0.1615 | 1.5637 | 1 |
| Inpatients and outpatients’ codes for OSA diagnoses within one-year of the index sleep study | 0.1518 | 1.4699 | 1 |
| Neighbourhood income status | 0.1447 | 1.4014 | 1 |
| Hypertension prevalence at the index sleep study | 0.1425 | 1.3799 | 1 |
| Asthma prevalence at the index sleep study | 0.1349 | 1.3061 | 1 |

ADP, assistive device program; AHI, apnea-hypopnea index; DS, daytime sleepiness; OSA, obstructive sleep apnea; PAP, positive airway pressure treatment

*an OSA relevant specialty (OSA billing physician specialty more frequently associated with a sleep medicine scope of practice): internal medicine, respirology, neurology, otolaryngology or psychiatry

**e-Table 6:** Descriptions of the CRAT models for primary definitions of OSA status (node information).

| **ID** | **Path** | **Count** | **OSA status** | | |  |
| --- | --- | --- | --- | --- | --- | --- |
| **0 (No)** |  | **1 (Yes)** |
|  | **OSA status: moderate to severe OSA (AHI≥15)** |  |  |  |  |  |
| **0** | **Root Node** | 5080 | 0.6728 | * | 0.3272 |  |
| **1** | A repeated sleep study within one-year of the index sleep study = 1 | 1222 | 0.2815 |  | 0.7185 | * |
| **2** | A repeated sleep study within one-year of the index sleep study = 0 or Missing | 3858 | 0.7968 | * | 0.2032 |  |
| **3** | PAP treatment claim within one-year of the index sleep study = 1 or Missing | 666 | 0.1997 |  | **0.8003** | * |
| **4** | PAP treatment claim within one-year of the index sleep study = 0 | 556 | 0.3795 |  | 0.6205 | * |
| **5** | An outpatient visit for OSA from a specialist physician# within one-year of the index sleep study = 1 | 1418 | 0.6248 | * | 0.3752 |  |
| **6** | An outpatient visit for OSA from a specialist physician# within one-year of the index sleep study = 0 or Missing | 2440 | 0.8967 | * | 0.1033 |  |
| **7** | Age at the index sleep study < 59.34 or Missing | 372 | 0.4597 |  | 0.5403 | * |
| **8** | Age at the index sleep study ≥ 59.34 | 184 | 0.2174 |  | 0.7826 | * |
| **9** | PAP treatment claim within one-year of the index sleep study = 1 | 373 | 0.3861 |  | 0.6139 | * |
| **A** | PAP treatment claim within one-year of the index sleep study = 0 or Missing | 1045 | 0.7100 | * | 0.2900 |  |
| **B** | Hypertension hospitalization in the last three years prior to the sleep study = 1 | 15 | 0.1333 |  | 0.8667 | * |
| **C** | Hypertension hospitalization in the last three years prior to the sleep study = 0 or Missing | 357 | 0.4734 |  | 0.5266 | * |
| **D** | Age at the index sleep study < 64.02 or Missing | 297 | 0.4377 |  | 0.5623 | * |
| **E** | Age at the index sleep study ≥ 64.02 | 76 | 0.1842 |  | 0.8158 | * |
| **F** | Sex = Male or Missing | 180 | 0.3778 |  | 0.6222 | * |
| **G** | Sex = Female | 117 | 0.5299 | * | 0.4701 |  |
| **H** | Age at the index sleep study < 51.54 | 54 | 0.6852 | * | 0.3148 |  |
| **I** | Age at the index sleep study >= 51.54 or Missing | 63 | 0.3968 |  | 0.6032 | * |
|  | **OSA status: severe OSA (AHI>30)** |  |  |  |  |  |
| **0** | Root Node | 5080 | 0.8738 | * | 0.1262 |  |
| **1** | A repeated sleep study within one-year of the index sleep study = 1 | 1222 | 0.6735 | * | 0.3265 |  |
| **2** | A repeated sleep study within one-year of the index sleep study = 0 or Missing | 3858 | 0.9373 | * | 0.0627 |  |
| **3** | Diabetes prevalence = 1 | 274 | 0.5401 | * | 0.4599 |  |
| **4** | Diabetes prevalence = 0 or Missing | 948 | 0.7120 | * | 0.2880 |  |
| **5** | Age at the index sleep study < 62.46 or Missing | 147 | 0.6463 | * | 0.3537 |  |
| **6** | Age at the index sleep study ≥ 62.46 | 127 | 0.4173 |  | 0.5827 | * |
| **7** | PAP treatment claim within one-year of the index sleep study = 1 or Missing | 508 | 0.6614 | * | 0.3386 |  |
| **8** | PAP treatment claim within one-year of the index sleep study = 0 | 440 | 0.7705 | * | 0.2295 |  |
| **9** | Outpatient OSA visit with a physician registered with ADP within one-year of the index sleep study = 1 | 41 | 0.2195 |  | 0.7805 | * |
| **A** | Outpatient OSA visit with a physician registered with ADP within one-year of the index sleep study = 0 or Missing | 86 | 0.5116 | * | 0.4884 |  |
| **B** | Age at the index sleep study < 70.26 or Missing | 473 | 0.6744 | * | 0.3256 |  |
| **C** | Age at the index sleep study ≥ 70.26 | 35 | 0.4857 |  | 0.5143 | * |
| **D** | Cardiovascular disease hospitalization in the last three years prior to the sleep study = 1 | 18 | 0.7778 | * | 0.2222 |  |
| **E** | Cardiovascular disease hospitalization in the last three years prior to the sleep study = 0 or Missing | 68 | 0.4412 |  | 0.5588 | * |

* Selected target level; Bold: Significant value.

#an OSA relevant specialty (OSA billing physician specialty more frequently associated with a sleep medicine scope of practice): internal medicine, respirology, neurology, otolaryngology or psychiatry

**e-Table 7a:** Estimates from logistic regression models utilizing variables derived from the classification and regression tree (CART) parsimonious models (on the Ottawa Hospital Sleep Database).

| **Population** | **Outcome** | **Variable** | **Estimate** | **Standard Error** | **Wald Chi-square** | **Pr > Chi-square** |
| --- | --- | --- | --- | --- | --- | --- |
| Total | Moderate to severe OSA (AHI≥15) | Age at the index sleep study* | 0.0321 | 0.00659 | 23.77 | <.0001 |
| Age at the index sleep study | -0.00354 | 0.00706 | 0.2514 | 0.6161 |
| PAP treatment claim within one-year of the index sleep study (vs. No) | 1.1908 | 0.0927 | 164.9782 | <.0001 |
| Hypertension hospitalization in the last three years prior to the sleep study (vs. No) | 0.5095 | 0.1708 | 8.9021 | 0.0028 |
| Outpatient visit for OSA from a specialist physician# within one-year of the index sleep study (vs. No) | 1.0691 | 0.0852 | 157.5888 | <.0001 |
| Male sex at the index sleep study (vs. female) | 0.6286 | 0.0754 | 69.5254 | <.0001 |
| A repeated sleep study within one-year of the index sleep study (vs. No) | 1.3489 | 0.0876 | 237.0233 | <.0001 |
| Total | Severe OSA  (AHI >30) | Age at the index sleep study* | 0.0142 | 0.00897 | 2.4988 | 0.1139 |
| Age at the index sleep study | 0.00724 | 0.00901 | 0.6469 | 0.4212 |
| PAP treatment claim within one-year of the index sleep study (vs. No) | 1.1214 | 0.104 | 116.3181 | <.0001 |
| Cardiovascular disease hospitalizations in the last three years prior to the sleep study (vs. No) | 0.3889 | 0.195 | 3.9784 | 0.0461 |
| Diabetes prevalence at the index sleep study (vs. No) | 0.535 | 0.1133 | 22.2812 | <.0001 |
| Outpatient OSA visit with a physician registered with ADP within the 3-years prior to the index sleep study (vs. No) | -0.0385 | 0.1173 | 0.1078 | 0.7427 |
| A repeated sleep study within one-year of the index sleep study (vs. No) | 1.3818 | 0.1026 | 181.2777 | <.0001 |
| Total | Mild OSA regardless of DS  (AHI≥5) | Age at the index sleep study* | 0.0473 | 0.00561 | 71.007 | <.0001 |
| Age at the index sleep study | -0.023 | 0.00675 | 11.5528 | 0.0007 |
| PAP treatment claim within one-year of the index sleep study (vs. No) | 1.4431 | 0.1771 | 66.3784 | <.0001 |
| Cancer hospitalizations in the last three years prior to the sleep study (vs. No) | 0.2679 | 0.3178 | 0.7109 | 0.3991 |
| Depression (hospitalization or outpatient visit) within the 3-years prior to the index sleep study (vs. No) | -0.2099 | 0.0728 | 8.3012 | 0.004 |
| Hypertension hospitalization in the last three years prior to the sleep study (vs. No) | 0.0825 | 0.2206 | 0.1399 | 0.7083 |
| Hypertension prevalence at the index sleep study (vs. No) | 0.4098 | 0.0922 | 19.765 | <.0001 |
| Neighbourhood Income: Q2 vs. Q1 | -0.3535 | 0.1279 | 7.6349 | 0.0057 |
| Neighbourhood Income: Q3 vs. Q1 | -0.253 | 0.1269 | 3.9765 | 0.0461 |
| Neighbourhood Income: Q4 vs. Q1 | -0.299 | 0.1207 | 6.1335 | 0.0133 |
| Neighbourhood Income: Q5 vs. Q1 | -0.4539 | 0.1233 | 13.5468 | 0.0002 |
| Outpatient OSA visit with a physician registered with ADP within one-year of the index sleep study (vs. No) | 1.1519 | 0.0802 | 206.1015 | <.0001 |
| Male sex at the index sleep study (vs. female) | 0.8238 | 0.0727 | 128.554 | <.0001 |
| A repeated sleep study within one-year of the index sleep study (vs. No) | 2.1208 | 0.1774 | 142.9882 | <.0001 |
| Male | Moderate to severe OSA (AHI≥15) | Age at the index sleep study* | 0.0329 | 0.00802 | 16.8073 | <.0001 |
| Age at the index sleep study | -0.0142 | 0.0092 | 2.3683 | 0.1238 |
| PAP treatment claim within one-year of the index sleep study (vs. No) | 1.1189 | 0.1183 | 89.4249 | <.0001 |
| Outpatient visit for OSA from a specialist physician# within one-year of the index sleep study (vs. No) | 1.0995 | 0.1083 | 103.1389 | <.0001 |
| A repeated sleep study within one-year of the index sleep study (vs. No) | 1.2145 | 0.1117 | 118.1419 | <.0001 |
| Male | Severe OSA  (AHI >30) | Age at the index sleep study* | 0.0206 | 0.0105 | 3.8473 | 0.0498 |
| Age at the index sleep study | -0.00132 | 0.0112 | 0.0139 | 0.9063 |
| PAP treatment claim within one-year of the index sleep study (vs. No) | 1.0554 | 0.124 | 72.448 | <.0001 |
| Diabetes prevalence at the index sleep study (vs. No) | 0.5506 | 0.1416 | 15.1222 | 0.0001 |
| Obesity hospitalizations in the last three years prior to the sleep study (vs. No) | 0.1055 | 0.5884 | 0.0321 | 0.8577 |
| A repeated sleep study within one-year of the index sleep study (vs. No) | 1.1314 | 0.1224 | 85.4516 | <.0001 |
| Female | Moderate to severe OSA (AHI≥15) | Age at the index sleep study* | 0.0373 | 0.0118 | 10.0689 | 0.0015 |
| Age at the index sleep study | 0.00991 | 0.0118 | 0.7085 | 0.3999 |
| PAP treatment claim within one-year of the index sleep study (vs. No) | 1.2432 | 0.1493 | 69.3335 | <.0001 |
| Outpatient visit for OSA from a specialist physician# within one-year of the index sleep study (vs. No) | 1.0187 | 0.1382 | 54.3635 | <.0001 |
| A repeated sleep study within one-year of the index sleep study (vs. No) | 1.6213 | 0.1411 | 132.1195 | <.0001 |
| Female | Severe OSA  (AHI >30) | Age at the index sleep study* | 0.00864 | 0.0178 | 0.2347 | 0.6281 |
| Age at the index sleep study | 0.0222 | 0.0168 | 1.7312 | 0.1883 |
| PAP treatment claim within one-year of the index sleep study (vs. No) | 1.1142 | 0.1909 | 34.0844 | <.0001 |
| Diabetes prevalence at the index sleep study (vs. No) | 0.6046 | 0.1929 | 9.8263 | 0.0017 |
| A repeated sleep study within one-year of the index sleep study (vs. No) | 1.8641 | 0.1916 | 94.6128 | <.0001 |
| Age 30-69 | Moderate to severe OSA (AHI≥15) | Age at the index sleep study* | 0.0182 | 0.00991 | 3.3569 | 0.0669 |
| Age at the index sleep study | 0.00854 | 0.0115 | 0.5541 | 0.4566 |
| PAP treatment claim within one-year of the index sleep study (vs. No) | 1.1343 | 0.0986 | 132.3378 | <.0001 |
| Outpatient visit for OSA from a specialist physician# within one-year of the index sleep study (vs. No) | 1.1531 | 0.093 | 153.6695 | <.0001 |
| A repeated sleep study within one-year of the index sleep study (vs. No) | 1.3366 | 0.0941 | 201.8345 | <.0001 |
| Age 30-69 | Severe OSA  (AHI >30) | Age at the index sleep study* | -0.00067 | 0.0135 | 0.0025 | 0.9602 |
| Age at the index sleep study | 0.0152 | 0.0148 | 1.0504 | 0.3054 |
| PAP treatment claim within one-year of the index sleep study (vs. No) | 0.9709 | 0.1162 | 69.8452 | <.0001 |
| Asthma prevalence at the index sleep study (vs. No) | -0.2717 | 0.1405 | 3.7395 | 0.0531 |
| COPD prevalence at the index sleep study (vs. No) | -0.2948 | 0.1783 | 2.7322 | 0.0983 |
| Diabetes prevalence at the index sleep study (vs. No) | 0.5112 | 0.1316 | 15.0801 | 0.0001 |
| Hypertension prevalence at the index sleep study (vs. No) | 0.3727 | 0.1138 | 10.7167 | 0.0011 |
| Neighbourhood Income: Q2 vs. Q1 | 0.0255 | 0.1795 | 0.0202 | 0.8868 |
| Neighbourhood Income: Q3 vs. Q1 | -0.1501 | 0.18 | 0.6953 | 0.4044 |
| Neighbourhood Income: Q4 vs. Q1 | -0.0995 | 0.168 | 0.3503 | 0.5539 |
| Neighbourhood Income: Q5 vs. Q1 | -0.2287 | 0.176 | 1.6879 | 0.1939 |
| Inpatients and outpatients’ codes for OSA diagnoses within one-year of the index sleep study (vs. No) | 0.8018 | 0.1517 | 27.9289 | <.0001 |
| Male sex at the index sleep study (vs. female) | 0.7015 | 0.1123 | 38.9921 | <.0001 |
| A repeated sleep study within one-year of the index sleep study (vs. No) | 1.0851 | 0.1166 | 86.655 | <.0001 |

*Age variable was transformed for the logistic regression model: a 3-knot restricted cubic spline was used; reference: first interval before the first knot

#an OSA relevant specialty (OSA billing physician specialty more frequently associated with a sleep medicine scope of practice): internal medicine, respirology, neurology, otolaryngology or psychiatry

**e-Table 7b:** Estimates from logistic regression models utilizing variables derived from the classification and full logistic regression models (on the Ottawa Hospital Sleep Database).

| **Outcome** | **Variable** | **Estimate** | **Standard Error** | **Wald Chi-square** | **Pr > Chi-square** |
| --- | --- | --- | --- | --- | --- |
| Moderate to severe OSA (AHI≥15) | Adenoid or/and tonsillectomy prevalence at the index sleep study (vs. No) | -0.0249 | 0.2685 | 0.0086 | 0.9261 |
| Age at the index sleep study* | 0.0243 | 0.00689 | 12.4155 | 0.0004 |
| Age at the index sleep study | -0.00299 | 0.00729 | 0.1686 | 0.6813 |
| Arrhythmia hospitalizations in the last three years prior to the sleep study | 0.1252 | 0.2522 | 0.2462 | 0.6198 |
| Asthma prevalence at the index sleep study (vs. No) | -0.3655 | 0.098 | 13.9033 | 0.0002 |
| Cancer hospitalizations in the last three years prior to the sleep study | 0.2195 | 0.3463 | 0.4017 | 0.5262 |
| Cardiovascular disease hospitalizations in the last three years prior to the sleep study | -0.1741 | 0.2899 | 0.3608 | 0.5481 |
| Charlson comorbidity index at the index sleep study, per one-unit increase | 0.0663 | 0.2661 | 0.062 | 0.8034 |
| CHF prevalence at the index sleep study (vs. No) | 0.4257 | 0.2128 | 4.0041 | 0.0454 |
| COPD hospitalizations in the last three years prior to the sleep study (vs. No) | -0.5888 | 0.347 | 2.8783 | 0.0898 |
| COPD prevalence at the index sleep study (vs. No) | -0.1699 | 0.1283 | 1.7544 | 0.1853 |
| Depression (hospitalization or outpatient visit) within the 3-years prior to the index sleep study (vs. No) | -0.2028 | 0.078 | 6.7649 | 0.0093 |
| Diabetes hospitalization in the last three years prior to the sleep study (vs. No) | 0.159 | 0.2772 | 0.329 | 0.5662 |
| Diabetes prevalence at the index sleep study (vs. No) | 0.1626 | 0.1218 | 1.7825 | 0.1818 |
| Hypertension hospitalization in the last three years prior to the sleep study (vs. No) | 0.1594 | 0.2126 | 0.5616 | 0.4536 |
| Hypertension prevalence at the index sleep study (vs. No) | 0.3698 | 0.0895 | 17.0812 | <.0001 |
| Neighbourhood Income: Q2 vs. Q1 | 0.1377 | 0.1338 | 1.0588 | 0.3035 |
| Neighbourhood Income: Q3 vs. Q1 | 0.0857 | 0.1325 | 0.4188 | 0.5175 |
| Neighbourhood Income: Q4 vs. Q1 | 0.0148 | 0.1266 | 0.0137 | 0.9069 |
| Neighbourhood Income: Q5 vs. Q1 | 0.0794 | 0.1291 | 0.3778 | 0.5388 |
| Inpatients and outpatients’ codes for OSA diagnoses within one-year of the index sleep study (vs. No) | 0.2174 | 0.1863 | 1.3623 | 0.2431 |
| Inpatients and outpatients’ codes for OSA diagnoses within the 3-years prior to the index sleep study (vs. No) | 0.2109 | 0.0976 | 4.6646 | 0.0308 |
| Male sex at the index sleep study (vs. female) | 0.541 | 0.0784 | 47.6169 | <.0001 |
| Myocardial Infarction prevalence at the index sleep study (vs. No) | 0.3949 | 0.259 | 2.3239 | 0.1274 |
| Obesity hospitalizations in the last three years prior to the sleep study (vs. No) | 0.1512 | 0.3772 | 0.1606 | 0.6886 |
| Outpatient OSA visit with a physician registered with ADP within one-year of the index sleep study (vs. No) | 0.0939 | 0.2955 | 0.1009 | 0.7508 |
| Outpatient OSA visit with a physician registered with ADP within the 3-years prior to the index sleep study (vs. No) | -0.0617 | 0.1534 | 0.1619 | 0.6874 |
| Outpatient visit for OSA from a specialist physician# within one-year of the index sleep study (vs. No) | 0.8432 | 0.2847 | 8.7707 | 0.0031 |
| Outpatient visit for OSA from a specialist physician# within the 3-years prior to the index sleep study (vs. No) | -0.2491 | 0.1619 | 2.3674 | 0.1239 |
| PAP treatment claim within one-year of the index sleep study (vs. No) | 1.1752 | 0.0946 | 154.321 | <.0001 |
| PAP treatment claim within the 3-years prior to the index sleep study (vs. No) | 0.5805 | 0.4575 | 1.6101 | 0.2045 |
| Rural location at the index sleep study (vs. No) | 0.0869 | 0.1436 | 0.3664 | 0.545 |
| A repeated sleep study within one-year of the index sleep study (vs. No) | 1.3468 | 0.0897 | 225.3108 | <.0001 |
| A prior sleep study within the 3-years prior to the index sleep study (vs. No) | -0.0714 | 0.2221 | 0.1034 | 0.7478 |
| Surgical procedures for OSA within one-year of the index sleep study (vs. No) | 0.4537 | 0.3588 | 1.5996 | 0.206 |
| Surgical procedures for OSA within the 3-years prior to the index sleep study (vs. No) | -0.659 | 0.577 | 1.3043 | 0.2534 |
| Severe OSA  (AHI >30) | Adenoid or/and tonsillectomy prevalence at the index sleep study (vs. No) | -0.4088 | 0.4245 | 0.9272 | 0.3356 |
| Age at the index sleep study* | 0.0106 | 0.00953 | 1.2382 | 0.2658 |
| Age at the index sleep study | 0.00592 | 0.00944 | 0.3931 | 0.5307 |
| Arrhythmia hospitalization in the last three years prior to the sleep study (vs. No) | 0.4679 | 0.274 | 2.9162 | 0.0877 |
| Asthma prevalence at the index sleep study (vs. No) | -0.2257 | 0.1273 | 3.1431 | 0.0762 |
| Cancer hospitalization in the last three years prior to the sleep study (vs. No) | 0.2685 | 0.375 | 0.5129 | 0.4739 |
| Cardiovascular disease hospitalization in the last three years prior to the sleep study (vs. No) | 0.1779 | 0.321 | 0.3072 | 0.5794 |
| Charlson comorbidity index at the index sleep study, per one-unit increase | 0.1071 | 0.2997 | 0.1276 | 0.7209 |
| CHF prevalence at the index sleep study (vs. No) | 0.288 | 0.2299 | 1.569 | 0.2103 |
| COPD hospitalization in the last three years prior to the sleep study (vs. No) | -1.0476 | 0.4979 | 4.4272 | 0.0354 |
| COPD prevalence at the index sleep study (vs. No) | -0.2183 | 0.1593 | 1.8782 | 0.1705 |
| Depression (hospitalization or outpatient visit) within the 3-years prior to the index sleep study (vs. No) | -0.0811 | 0.1002 | 0.6552 | 0.4183 |
| Diabetes hospitalization in the last three years prior to the sleep study (vs. No) | -0.1753 | 0.3081 | 0.3236 | 0.5694 |
| Diabetes prevalence at the index sleep study (vs. No) | 0.5029 | 0.1366 | 13.5527 | 0.0002 |
| Hypertension hospitalizations in the last three years prior to the sleep study (vs. No) | -0.4148 | 0.2444 | 2.88 | 0.0897 |
| Hypertension prevalence at the index sleep study (vs. No) | 0.3515 | 0.1097 | 10.2754 | 0.0013 |
| Neighbourhood Income: Q2 vs. Q1 | 0.0577 | 0.1635 | 0.1244 | 0.7243 |
| Neighbourhood Income: Q3 vs. Q1 | -0.2319 | 0.1674 | 1.9189 | 0.166 |
| Neighbourhood Income: Q4 vs. Q1 | -0.1553 | 0.156 | 0.9902 | 0.3197 |
| Neighbourhood Income: Q5 vs. Q1 | -0.232 | 0.1608 | 2.0821 | 0.149 |
| Inpatients and outpatients’ codes for OSA diagnoses within one-year of the index sleep study (vs. No) | 0.2961 | 0.2922 | 1.0267 | 0.3109 |
| Inpatients and outpatients’ codes for OSA diagnoses within the 3-years prior to the index sleep study (vs. No) | 0.0505 | 0.1226 | 0.1697 | 0.6804 |
| Male sex at the index sleep study (vs. female) | 0.6306 | 0.1042 | 36.6133 | <.0001 |
| Myocardial Infarction prevalence at the index sleep study (vs. No) | 0.2864 | 0.2773 | 1.0666 | 0.3017 |
| Obesity hospitalization in the last three years prior to the sleep study (vs. No) | 0.1354 | 0.477 | 0.0806 | 0.7765 |
| Outpatient OSA visit with a physician registered with ADP within one-year of the index sleep study (vs. No) | 0.5283 | 0.4404 | 1.4391 | 0.2303 |
| Outpatient OSA visit with a physician registered with ADP within the 3-years prior to the index sleep study (vs. No) | -0.0513 | 0.1925 | 0.071 | 0.7899 |
| Outpatient visit for OSA from a specialist# physician within one-year of the index sleep study (vs. No) | 0.0742 | 0.4078 | 0.0331 | 0.8556 |
| Outpatient visit for OSA from a specialist physician# within the 3-years prior to the index sleep study (vs. No) | 0.0216 | 0.2015 | 0.0115 | 0.9144 |
| PAP treatment claim within one-year of the index sleep study (vs. No) | 0.8991 | 0.1074 | 70.0176 | <.0001 |
| PAP treatment claim within the 3-years prior to the index sleep study (vs. No) | 0.3483 | 0.6893 | 0.2553 | 0.6134 |
| Rural location at the index sleep study (vs. No) | 0.0589 | 0.1796 | 0.1076 | 0.7429 |
| A repeated sleep study within one-year of the index sleep study (vs. No) | 1.1085 | 0.1075 | 106.4053 | <.0001 |
| A prior sleep study within the 3-years prior to the index sleep study (vs. No) | -0.5141 | 0.3299 | 2.4286 | 0.1191 |
| Surgical procedures for OSA within one-year of the index sleep study (vs. No) | 0.4031 | 0.3927 | 1.0537 | 0.3047 |
| Surgical procedures for OSA within the 3-years prior to the index sleep study (vs. No) | -0.5705 | 0.8614 | 0.4387 | 0.5078 |
| Mild OSA regardless of DS  (AHI≥5) | Adenoid or/and tonsillectomy prevalence at the index sleep study (vs. No) | 0.2053 | 0.2222 | 0.854 | 0.3554 |
| Age at the index sleep study* | 0.0472 | 0.00583 | 65.5354 | <.0001 |
| Age at the index sleep study | -0.0209 | 0.00697 | 8.9731 | 0.0027 |
| Arrhythmia hospitalization in the last three years prior to the sleep study (vs. No) | 0.1315 | 0.2914 | 0.2036 | 0.6518 |
| Asthma prevalence at the index sleep study (vs. No) | -0.1227 | 0.0905 | 1.8372 | 0.1753 |
| Cancer hospitalization in the last three years prior to the sleep study (vs. No) | -0.0327 | 0.3938 | 0.0069 | 0.9338 |
| Cardiovascular disease hospitalization in the last three years prior to the sleep study (vs. No) | -0.3908 | 0.3262 | 1.4358 | 0.2308 |
| Charlson comorbidity index at the index sleep study, per one-unit increase | 0.4151 | 0.3001 | 1.9132 | 0.1666 |
| CHF prevalence at the index sleep study (vs. No) | 0.1752 | 0.2568 | 0.4651 | 0.4952 |
| COPD hospitalization in the last three years prior to the sleep study (vs. No) | -0.4883 | 0.3745 | 1.6997 | 0.1923 |
| COPD prevalence at the index sleep study (vs. No) | -0.2895 | 0.1299 | 4.9714 | 0.0258 |
| Depression (hospitalization or outpatient visit) within the 3-years prior to the index sleep study (vs. No) | -0.1922 | 0.0739 | 6.7731 | 0.0093 |
| Diabetes hospitalization in the last three years prior to the sleep study (vs. No) | -0.3766 | 0.3182 | 1.4002 | 0.2367 |
| Diabetes prevalence at the index sleep study (vs. No) | 0.0783 | 0.1338 | 0.3424 | 0.5584 |
| Hypertension hospitalization in the last three years prior to the sleep study (vs. No) | 0.1761 | 0.257 | 0.4693 | 0.4933 |
| Hypertension prevalence at the index sleep study (vs. No) | 0.415 | 0.0954 | 18.9408 | <.0001 |
| Neighbourhood Income: Q2 vs. Q1 | -0.3695 | 0.1292 | 8.1815 | 0.0042 |
| Neighbourhood Income: Q3 vs. Q1 | -0.2821 | 0.128 | 4.8565 | 0.0275 |
| Neighbourhood Income: Q4 vs. Q1 | -0.3195 | 0.122 | 6.8634 | 0.0088 |
| Neighbourhood Income: Q5 vs. Q1 | -0.4779 | 0.1251 | 14.5866 | 0.0001 |
| Inpatients and outpatients’ codes for OSA diagnoses within one-year of the index sleep study (vs. No) | 0.3034 | 0.1404 | 4.6693 | 0.0307 |
| Inpatients and outpatients’ codes for OSA diagnoses within the 3-years prior to the index sleep study (vs. No) | 0.000044 | 0.0955 | 0 | 0.9996 |
| Male sex at the index sleep study (vs. female) | 0.8104 | 0.0743 | 118.8781 | <.0001 |
| Myocardial Infarction prevalence at the index sleep study (vs. No) | 0.5376 | 0.3178 | 2.862 | 0.0907 |
| Obesity hospitalization in the last three years prior to the sleep study (vs. No) | -0.2763 | 0.4131 | 0.4474 | 0.5036 |
| Outpatient OSA visit with a physician registered with ADP within one-year of the index sleep study (vs. No) | 0.6902 | 0.251 | 7.5619 | 0.006 |
| Outpatient OSA visit with a physician registered with ADP within the 3-years prior to the index sleep study (vs. No) | -0.1661 | 0.155 | 1.1478 | 0.284 |
| Outpatient visit for OSA from a specialist physician# within one-year of the index sleep study (vs. No) | 0.288 | 0.2423 | 1.4121 | 0.2347 |
| Outpatient visit for OSA from a specialist physician# within the 3-years prior to the index sleep study (vs. No) | -0.1232 | 0.1645 | 0.5607 | 0.454 |
| PAP treatment claim within one-year of the index sleep study (vs. No) | 1.4108 | 0.1782 | 62.7068 | <.0001 |
| PAP treatment claim within the 3-years prior to the index sleep study (vs. No) | 1.2952 | 0.4974 | 6.7802 | 0.0092 |
| Rural location at the index sleep study (vs. No) | -0.0369 | 0.1428 | 0.0668 | 0.796 |
| A repeated sleep study within one-year of the index sleep study (vs. No) | 2.1015 | 0.1789 | 138.0561 | <.0001 |
| A prior sleep study within the 3-years prior to the index sleep study (vs. No) | -0.4484 | 0.2173 | 4.2566 | 0.0391 |
| Surgical procedures for OSA within one-year of the index sleep study (vs. No) | 1.2495 | 0.4457 | 7.8598 | 0.0051 |
| Surgical procedures for OSA within the 3-years prior to the index sleep study (vs. No) | -0.6976 | 0.5597 | 1.5535 | 0.2126 |
| AHI ≥5 and ESS≥13 | Adenoid or/and tonsillectomy prevalence at the index sleep study (vs. No) | -0.3817 | 0.3346 | 1.3008 | 0.2541 |
| Age at the index sleep study* | 0.0125 | 0.00794 | 2.468 | 0.1162 |
| Age at the index sleep study | -0.0231 | 0.00895 | 6.6531 | 0.0099 |
| Arrhythmia hospitalizations in the last three years prior to the sleep study (vs. No) | 0.3217 | 0.2976 | 1.1682 | 0.2798 |
| Asthma prevalence at the index sleep study (vs. No) | -0.0609 | 0.1133 | 0.2894 | 0.5906 |
| Cancer hospitalization in the last three years prior to the sleep study (vs. No) | -0.1668 | 0.4351 | 0.147 | 0.7014 |
| Cardiovascular disease hospitalization in the last three years prior to the sleep study (vs. No) | -0.0485 | 0.351 | 0.0191 | 0.8901 |
| Charlson comorbidity index at the index sleep study, per one-unit increase | 0.0447 | 0.3194 | 0.0196 | 0.8886 |
| CHF prevalence at the index sleep study (vs. No) | 0.0615 | 0.2612 | 0.0554 | 0.8139 |
| COPD hospitalization in the last three years prior to the sleep study (vs. No) | -0.054 | 0.4494 | 0.0144 | 0.9044 |
| COPD prevalence at the index sleep study (vs. No) | -0.0532 | 0.1562 | 0.1158 | 0.7336 |
| Depression (hospitalization or outpatient visit) within the 3-years prior to the index sleep study (vs. No) | 0.1872 | 0.0922 | 4.1276 | 0.0422 |
| Diabetes hospitalization in the last three years prior to the sleep study (vs. No) | 0.00451 | 0.3377 | 0.0002 | 0.9894 |
| Diabetes prevalence at the index sleep study (vs. No) | 0.071 | 0.1473 | 0.2324 | 0.6297 |
| Hypertension hospitalization in the last three years prior to the sleep study (vs. No) | 0.1814 | 0.266 | 0.4652 | 0.4952 |
| Hypertension prevalence at the index sleep study (vs. No) | -0.0869 | 0.1101 | 0.6233 | 0.4298 |
| Neighbourhood Income: Q2 vs. Q1 | -0.3069 | 0.1494 | 4.2162 | 0.04 |
| Neighbourhood Income: Q3 vs. Q1 | -0.2127 | 0.1455 | 2.1371 | 0.1438 |
| Neighbourhood Income: Q4 vs. Q1 | -0.3671 | 0.1403 | 6.8468 | 0.0089 |
| Neighbourhood Income: Q5 vs. Q1 | -0.578 | 0.1497 | 14.9087 | 0.0001 |
| Inpatients and outpatients’ codes for OSA diagnoses within one-year of the index sleep study (vs. No) | 0.3104 | 0.2483 | 1.5626 | 0.2113 |
| Inpatients and outpatients’ codes for OSA diagnoses within the 3-years prior to the index sleep study (vs. No) | -0.1112 | 0.117 | 0.9029 | 0.342 |
| Male sex at the index sleep study (vs. female) | 0.0908 | 0.0941 | 0.9327 | 0.3342 |
| Myocardial Infarction prevalence at the index sleep study (vs. No) | -0.143 | 0.325 | 0.1936 | 0.66 |
| Obesity hospitalization in the last three years prior to the sleep study (vs. No) | -13.7897 | 345.3 | 0.0016 | 0.9681 |
| Outpatient OSA visit with a physician registered with ADP within one-year of the index sleep study (vs. No) | 0.4341 | 0.378 | 1.3187 | 0.2508 |
| Outpatient OSA visit with a physician registered with ADP within the 3-years prior to the index sleep study (vs. No) | 0.2303 | 0.1818 | 1.6056 | 0.2051 |
| Outpatient visit for OSA from a specialist physician# within one-year of the index sleep study (vs. No) | 0.303 | 0.353 | 0.7369 | 0.3907 |
| Outpatient visit for OSA from a specialist physician# within the 3-years prior to the index sleep study (vs. No) | -0.1621 | 0.192 | 0.7126 | 0.3986 |
| PAP treatment claim within one-year of the index sleep study (vs. No) | 0.438 | 0.1075 | 16.6133 | <.0001 |
| PAP treatment claim within the 3-years prior to the index sleep study (vs. No) | 0.2105 | 0.7851 | 0.0719 | 0.7886 |
| Rural location at the index sleep study (vs. No) | 0.4115 | 0.1569 | 6.8751 | 0.0087 |
| A repeated sleep study within one-year of the index sleep study (vs. No) | 0.5466 | 0.1056 | 26.7708 | <.0001 |
| A prior sleep study within the 3-years prior to the index sleep study (vs. No) | -0.6178 | 0.3435 | 3.2344 | 0.0721 |
| Surgical procedures for OSA within one-year of the index sleep study (vs. No) | -0.9871 | 0.5402 | 3.3389 | 0.0677 |
| Surgical procedures for OSA within the 3-years prior to the index sleep study (vs. No) | -12.5788 | 460.7 | 0.0007 | 0.9782 |

*Age variable was transformed for the logistic regression model: a 3-knot restricted cubic spline was used; reference: first interval before the first knot

#an OSA relevant specialty (OSA billing physician specialty more frequently associated with a sleep medicine scope of practice): internal medicine, respirology, neurology, otolaryngology or psychiatry

**e-Table 8:** Calibration coefficients for external validation

|  | **c-statistic** | **Mean Integrated Calibration Index*** | **Calibration-in-the-large (SE, p value)** | **Calibration Slope**  **(SE, p value)** |
| --- | --- | --- | --- | --- |
| **Apnea-hypopnea index (AHI) ≥15: Moderate to severe OSA** | | | | |
| **Classification regression tree (CART) Models** | | | | |
| Parsimonious | 0.75 | 0.06 | — | — |
| **Logistic regression Models** | | | | |
| Parsimonious | 0.81 | 0.03 | 0.20 (0.02, <.0001) | 1.07 (0.02, <.0001) |
| Full | 0.81 | 0.02 | 0.10 (0.02, <.0001) | 1.05 (0.02, <.0001) |
|  | | | | |
| **AHI >30: Severe OSA** | | | | |
| **CART Models** | | | | |
| Parsimonious | 0.67 | 0.12 | — | — |
| **Logistic regression Models** | | | | |
| Parsimonious | 0.80 | 0.11 | 0.91 (0.04, <.0001) | 0.99 (0.02, <.0001) |
| Full | 0.81 | 0.08 | 0.80 (0.04, <.0001) | 1.12 (0.02, <.0001) |
|  |  |  |  |  |
| **Apnea-hypopnea index (AHI) ≥5:** | | | | |
| **Classification regression tree (CART) Models** | | | | |
| Parsimonious | 0.76 | 0.07 | — | — |
| **Logistic regression Models** | | | | |
| Parsimonious | 0.80 | 0.07 | -0.48 (0.03, <.0001) | 0.99 (0.02, <.0001) |
| Full | 0.80 | 0.07 | -0.44 (0.03, <.0001) | 0.96 (0.02, <.0001) |
|  | | | | |
| **AHI ≥5 and ESS ≥13** | | | | |
| **Logistic regression Models** | | | | |
| Full | 0.63 | 0.02 | -1.50 (0.03, <.0001) | 0.06 (0.01, <.0001) |

*Mean Integrated Calibration Index (ICI) and C-statistics were available for both CART and logistic regression models; other calibration indexes were available for logistic regression models only.

Perfect predictions should be on the ideal diagonal line, described with a calibration intercept of zero, reflecting baseline predicted versus observed risk differences, and a calibration slope of one, reflecting the overall prognostic effects in the predictions16. An estimated regression slope that exceeds one denotes underfitting, while a regression slope less than one denotes overfitting. The ICI (ranges between 0 and 1) represents a single numeric summary of calibration, which incorporates the distribution of predicted probabilities16. It can be interpreted as the weighted mean absolute difference between observed and predicted probabilities of the occurrence of the outcome (i.e., between a smoothed calibration curve and the diagonal line of perfect calibration), where differences are weighted by the empirical distribution of the predicted probabilities16

**e-Table 9:** The sensitivity and specificity with 95% confidence interval for the separate variables to be considered in a statistical model to identify individuals with mild to severe obstructive sleep apnea (OSA) (AHI≥5).

|  | **Internal validation cohort**  **(2015-2017)** | | **External validation cohort**  **(2007-2015)** | |
| --- | --- | --- | --- | --- |
| **Variable** | **Sensitivity (95% CI)** | **Specificity (95% CI)** | **Sensitivity (95% CI)** | **Specificity (95% CI)** |
| **Demographics at the date of the index sleep study** | | | | |
| Male Sex | 61.05 (59.36-62.73) | 60.45 (58.17-62.69) | 65.62 (64.67-66.57) | 55.51 (53.92-57.10) |
| Rural location | 7.29 (6.42-8.23) | 93.34 (92.10-94.44) | 16.97 (16.23-17.73) | 84.39 (83.20-85.53) |
| **Prevalent comorbidities at the date of the index sleep study** | | | | |
| Adenoid or/and tonsillectomy | 2.08 (1.62-2.63) | 96.45 (95.50-97.25) | 1.36 (1.14-1.61) | 96.45 (95.81-97.01) |
| Asthma | 20.55 (19.17-21.97) | 75.50 (73.47-77.46) | 15.35 (14.64-16.08) | 79.21 (77.88-80.49) |
| CHF | 4.93 (4.21-5.73) | 98.20 (97.48-98.76) | 5.83 (5.37-6.32) | 97.39 (96.84-97.88) |
| COPD | 11.64 (10.55-12.78) | 90.94 (89.54-92.22) | 13.65 (12.97-14.35) | 90.84 (89.88-91.74) |
| Diabetes | 18.43 (17.12-19.81) | 90.62 (89.19-91.91) | 21.13 (20.32-21.96) | 87.47 (86.38-88.51) |
| Hypertension | 38.79 (37.12-40.49) | 80.96 (79.09-82.73) | 48.00 (47.00-49.00) | 71.33 (69.87-72.77) |
| Myocardial Infarction | 3.03 (2.47-3.68) | 99.02 (98.45-99.42) | 3.64 (3.28-4.04) | 98.71 (98.30-99.04) |
| **Events within the 3-year prior to the index sleep study** | | | | |
| Inpatients and outpatients’ codes for OSA diagnoses | 40.29 (38.61-42.00) | 63.56 (61.31-65.76) | 44.18 (43.19-45.18) | 49.99 (48.38-51.59) |
| Outpatient OSA visit with a physician registered with ADP | 19.53 (18.19-20.94) | 83.31 (81.52-84.99) | 29.62 (28.71-30.54) | 64.15 (62.60-65.68) |
| Outpatient OSA visit with a specialist physician* | 15.25 (14.03-16.53) | 87.45 (85.85-88.94) | 18.28 (17.52-19.07) | 74.94 (73.53-76.31) |
| Surgical procedures for OSA# | 0.49 (0.28-0.79) | 99.24 (98.72-99.58) | 0.68 (0.53-0.87) | 99.50 (99.22-99.70) |
| PAP treatment | 0.77 (0.50-1.13) | 99.45 (99.00-99.74) | 1.04 (0.85-1.27) | 98.21 (97.74-98.61) |
| A prior sleep study | 3.12 (2.55-3.78) | 96.24 (95.26-97.06) | 4.44 (4.04-4.87) | 92.18 (91.28-93.02) |
| Depression (hospitalization or outpatient visit) | 38.98 (37.30-40.67) | 51.94 (49.62-54.25) | 37.35 (36.38-38.32) | 53.44 (51.83-55.03) |
| COPD hospitalizations | 1.50 (1.11-1.98) | 98.69 (98.06-99.16) | 2.62 (2.31-2.96) | 98.18 (97.71-98.58) |
| Arrhythmia hospitalizations | 3.09 (2.53-3.75) | 98.69 (98.06-99.16) | 3.30 (2.96-3.68) | 98.63 (98.21-98.98) |
| Cancer hospitalizations | 1.99 (1.54-2.53) | 99.07 (98.52-99.46) | 1.75 (1.50-2.04) | 98.95 (98.57-99.25) |
| Cardiovascular disease hospitalizations | 4.93 (4.21-5.73) | 97.98 (97.23-98.57) | 6.04 (5.57-6.53) | 97.18 (96.61-97.69) |
| Charlson comorbidity index | 11.97 (10.88-13.13) | 94.16 (92.99-95.19) | 14.90 (14.19-15.62) | 91.71 (90.79-92.57) |
| Diabetes hospitalizations | 6.34 (5.53-7.23) | 97.22 (96.36-97.92) | 8.06 (7.53-8.62) | 95.60 (94.90-96.23) |
| Hypertension hospitalizations | 5.66 (4.90-6.51) | 97.98 (97.23-98.57) | 7.95 (7.42-8.51) | 96.37 (95.72-96.94) |
| Obesity hospitalizations | 1.26 (0.90-1.70) | 98.80 (98.19-99.25) | 2.45 (2.15-2.77) | 98.60 (98.18-98.95) |
| **Events within 1-year follow-up since the index sleep study** | | | | |
| Inpatients and outpatients’ codes for OSA diagnoses | 71.56 (69.97-73.10) | 70.87 (68.73-72.94) | 99.51 (99.36-99.64) | 0.66 (0.43-0.97) |
| Outpatient OSA visit with a specialist physician* | 66.20 (64.55-67.82) | 79.21 (77.28-81.05) | 89.89 (89.28-90.49) | 14.14 (13.04-15.28) |
| Outpatient OSA visit with a physician registered with ADP | 66.93 (65.29-68.55) | 78.72 (76.78-80.58) | 99.46 (99.30-99.60) | 0.76 (0.51-1.09) |
| PAP treatment | 30.96 (29.37-32.57) | 97.76 (96.98-98.39) | 35.81 (34.86-36.77) | 94.42 (93.64-95.13) |
| Surgical procedures for OSA# | 1.35 (0.98-1.80) | 99.56 (99.14-99.81) | 1.01 (0.82-1.23) | 99.13 (98.78-99.40) |
| A repeated sleep study | 36.28 (34.63-37.96) | 97.82 (97.04-98.44) | 32.46 (31.52-33.40) | 97.87 (97.36-98.30) |

ADP, assistive device program; AHI, apnea-hypopnea index; CHF, chronic heart failure; CI, confidence interval; COPD, chronic obstructive pulmonary disease; OSA, obstructive sleep apnea

*an OSA relevant specialty (OSA billing physician specialty more frequently associated with a sleep medicine scope of practice): internal medicine, respirology, neurology, otolaryngology or psychiatry

#Surgical procedures for OSA: maxillomandibular advancement surgery, uvulopalato-pharyngoplasty, tonsillectomy and/or adenoidectomy or bariatric surgery

**e-Table 10:** The sensitivity and specificity with 95% confidence interval for the separate variables to be considered in a statistical model to identify individuals with mild to severe obstructive sleep apnea (OSA) with and excessive daytime sleepiness (AHI≥5&ESS≥13).

|  | **Internal validation cohort**  **(2015-2017)** | | **External validation cohort**  **(2007-2015)** | |
| --- | --- | --- | --- | --- |
| **Variable** | **Sensitivity (95% CI)** | **Specificity (95% CI)** | **Sensitivity (95% CI)** | **Specificity (95% CI)** |
| **Demographics at the date of the index sleep study** | | | | |
| Male Sex | 59.24 (55.28-63.11) | 47.51 (46.03-48.98) | 63.76 (61.73-65.75) | 41.15 (40.24-42.06) |
| Rural location | 9.71 (7.51-12.30) | 93.31 (92.54-94.03) | 17.81 (16.25-19.46) | 83.66 (82.96-84.34) |
| **Prevalent comorbidities at the date of the index sleep study** | | | | |
| Adenoid or/and tonsillectomy | 1.75 (0.88-3.11) | 97.27 (96.75-97.73) | 0.93 (0.58-1.43) | 97.81 (97.52-98.07) |
| Asthma | 20.70 (17.60-24.08) | 77.86 (76.61-79.07) | 16.83 (15.30-18.44) | 83.10 (82.40-83.79) |
| CHF | 4.46 (2.98-6.38) | 96.29 (95.69-96.82) | 5.21 (4.33-6.21) | 95.13 (94.72-95.52) |
| COPD | 10.67 (8.36-13.35) | 89.29 (88.34-90.18) | 13.62 (12.23-15.11) | 87.86 (87.25-88.46) |
| Diabetes | 17.83 (14.92-21.06) | 85.19 (84.12-86.22) | 22.44 (20.73-24.22) | 82.04 (81.31-82.74) |
| Hypertension | 33.44 (29.76-37.28) | 68.55 (67.17-69.91) | 46.88 (44.80-48.97) | 58.31 (57.39-59.22) |
| Myocardial Infarction | 2.39 (1.34-3.91) | 97.72 (97.24-98.14) | 3.43 (2.71-4.27) | 97.11 (96.78-97.41) |
| **Events within the 3-year prior to the index sleep study** | | | | |
| Inpatients and outpatients’ codes for OSA diagnoses | 39.49 (35.64-43.44) | 61.17 (59.73-62.60) | 42.74 (40.69-44.82) | 53.56 (52.63-54.48) |
| Outpatient OSA visit with a physician registered with ADP | 19.43 (16.40-22.74) | 81.61 (80.45-82.74) | 28.14 (26.29-30.05) | 67.98 (67.11-68.84) |
| Outpatient OSA visit with a specialist physician* | 14.17 (11.54-17.15) | 85.71 (84.65-86.72) | 17.94 (16.38-19.59) | 79.36 (78.60-80.10) |
| Surgical procedures for OSA# | 0.00 (0-0) | 99.33 (99.04-99.55) | 0.36 (0.15-0.70) | 99.31 (99.14-99.46) |
| PAP treatment | 0.32 (0.04-1.15) | 99.26 (98.96-99.49) | 0.85 (0.51-1.32) | 98.67 (98.44-98.87) |
| A prior sleep study | 1.75 (0.88-3.11) | 96.42 (95.83-96.95) | 4.23 (3.44-5.15) | 94.38 (93.94-94.80) |
| Depression (hospitalization or outpatient visit) | 44.11 (40.18-48.09) | 58.02 (56.56-59.47) | 40.12 (38.08-42.18) | 60.09 (59.18-61.00) |
| COPD hospitalizations | 1.27 (0.55-2.49) | 98.55 (98.15-98.88) | 2.89 (2.24-3.67) | 97.70 (97.41-97.97) |
| Arrhythmia hospitalizations | 3.18 (1.96-4.88) | 97.65 (97.16-98.08) | 3.16 (2.48-3.97) | 97.32 (97.01-97.61) |
| Cancer hospitalizations | 1.43 (0.66-2.70) | 98.37 (97.95-98.72) | 1.34 (0.90-1.90) | 98.40 (98.15-98.62) |
| Cardiovascular disease hospitalizations | 4.46 (2.98-6.38) | 96.20 (95.59-96.74) | 5.79 (4.86-6.84) | 95.00 (94.58-95.40) |
| Charlson comorbidity index | 10.83 (8.51-13.52) | 90.38 (89.48-91.23) | 15.14 (13.68-16.69) | 87.38 (86.76-87.99) |
| Diabetes hospitalizations | 6.21 (4.45-8.39) | 95.10 (94.43-95.72) | 8.59 (7.47-9.83) | 93.28 (92.80-93.74) |
| Hypertension hospitalizations | 5.10 (3.51-7.12) | 95.75 (95.12-96.32) | 8.46 (7.34-9.69) | 93.61 (93.14-94.06) |
| Obesity hospitalizations | 0.00 (0-0) | 98.59 (98.20-98.92) | 2.54 (1.93-3.28) | 97.93 (97.65-98.18) |
| **Events within 1-year follow-up since the index sleep study** | | | | |
| Inpatients and outpatients’ codes for OSA diagnoses | 80.73 (77.43-83.75) | 47.13 (45.65-48.60) | 99.38 (98.96-99.66) | 0.52 (0.39-0.67) |
| Outpatient OSA visit with a specialist physician* | 76.59 (73.08-79.85) | 53.88 (52.41-55.35) | 92.03 (90.83-93.12) | 11.90 (11.30-12.51) |
| Outpatient OSA visit with a physician registered with ADP | 77.23 (73.75-80.45) | 53.23 (51.76-54.70) | 99.33 (98.90-99.63) | 0.59 (0.45-0.75) |
| PAP treatment | 39.81 (35.96-43.76) | 82.06 (80.91-83.18) | 47.24 (45.16-49.33) | 76.69 (75.90-77.47) |
| Surgical procedures for OSA# | 0.64 (0.17-1.62) | 98.93 (98.58-99.21) | 1.02 (0.65-1.53) | 99.04 (98.84-99.21) |
| A repeated sleep study | 46.18 (42.23-50.17) | 79.09 (77.87-80.27) | 39.36 (37.33-41.41) | 79.17 (78.41-79.92) |

ADP, assistive device program; AHI, apnea-hypopnea index; CHF, chronic heart failure; CI, confidence interval; COPD, chronic obstructive pulmonary disease; OSA, obstructive sleep apnea

*an OSA relevant specialty (OSA billing physician specialty more frequently associated with a sleep medicine scope of practice): internal medicine, respirology, neurology, otolaryngology or psychiatry

#Surgical procedures for OSA: maxillomandibular advancement surgery, uvulopalato-pharyngoplasty, tonsillectomy and/or adenoidectomy or bariatric surgery

**e-Table 11:** Internal (the Ottawa Hospital Sleep Database) and external (the London Health Sciences Centre Sleep and Apnea Assessment Unit PSG database) validation measures of CARTs and logistic regression models developed to identify individuals with mild to severe obstructive sleep apnea (OSA) with or without excessive daytime sleepiness.

|  | **c-statistic*** | | **Sensitivity#** | | **Specificity#** | | **Positive**  **Predictive**  **Value**¶ | | **Negative**  **Predictive**  **Value** | | **Positive**  **Likelihood**  **Ratio#** | | **Negative**  **Likelihood**  **Ratio#** | |
| --- | --- | --- | --- | --- | --- | --- | --- | --- | --- | --- | --- | --- | --- | --- |
|  | Int | Ext | Int | Extern | Int | Ext | Int | Ext | Int | Ext | Int | Ext | Int | Ext |
| **Apnea-hypopnea index (AHI) ≥5:** | | | | | | | | | | | | | | |
| **Classification regression tree (CART) Models** | | | | | | | | | | | | | | |
| Parsimonious | 0.77 | 0.76 | 0.81  (0.79-0.82) | 0.95  (0.94-0.95) | 0.70  (0.68-0.72) | 0.25  (0.24-0.27) | 0.83  (0.81-0.84) | 0.76  (0.76-0.77) | 0.67  (0.65-0.69) | 0.65  (0.62-0.67) | 2.70 | 1.27 | 0.27 | 0.20 |
| **Logistic Regression Models** | | | | | | | | | | | | | | |
| Parsimonious | 0.84 | 0.80 | 0.82  (0.80-0.83) | 0.97  (0.97-0.97) | 0.66  (0.64-0.69) | 0.19  (0.17-0.20) | 0.81  (0.80-0.83) | 0.75  (0.74-0.76) | 0.67  (0.65-0.69) | 0.71  (0.68-0.74) | 2.41 | 1.20 | 0.27 | 0.16 |
| Full | 0.84 | 0.80 | 0.82  (0.81-0.83) | 0.96  (0.96-0.97) | 0.67  (0.65-0.69) | 0.20  (0.19-0.21) | 0.81  (0.80-0.83) | 0.75  (0.75-0.76) | 0.68  (0.65-0.70) | 0.68  (0.65-0.71) | 2.48 | 1.20 | 0.27 | 0.20 |
|  | | | | | | | | | | | | | | |
| **AHI ≥5 and ESS ≥13** | | | | | | | | | | | | | | |
| **Logistic Regression Models** | | | | | | | | | | | | | | |
| Full | 0.69 | 0.63 | 0.00  (0.00-0.01) | 0.00  (0.00-0.01) | 1.00  (1.00-1.00) | 1.00  (1.00-1.00) | 0.67  (0.09-0.99) | 0.38  (0.09-0.76) | 0.88  (0.87-0.89) | 0.83  (0.83-0.84) | — | — | — | 1 |

*Bootstrap Optimism Corrected for the internal validation (rep=1000)

#Sensitivity, specificity, positive and negative predictive values, and positive and negative likelihood ratios were calculated as based on an estimated probability of 0.5 or greater to classify individuals as having OSA.

AHI≥5: Outpatient OSA visit with a physician registered with ADP within one-year of the index sleep study, age at the index sleep study, a repeated sleep study within one-year of the index sleep study, male sex, PAP treatment claim within one-year of the index sleep study, depression (hospitalization or outpatient visit) within the 3-years prior to the index sleep study, hypertension prevalence at the index sleep study, cancer hospitalizations within the 3-years prior to the index sleep study, Neighbourhood income status at the index sleep study, hypertension hospitalization within the 3-years prior to the index sleep study.

**e-Table 12**. Internal (the Ottawa Hospital Sleep Database) and external (the London Health Sciences Centre Sleep and Apnea Assessment Unit PSG database) validation measures of CARTs and logistic regression models developed to identify individuals with moderate to severe or severe obstructive sleep apnea (OSA) for subgroups.

|  | **c-statistic*** | | **Sensitivity#** | | **Specificity#** | | **Positive**  **Likelihood Ratio#** | | **Negative**  **Likelihood Ratio#** | |
| --- | --- | --- | --- | --- | --- | --- | --- | --- | --- | --- |
| Int | Ext | Int | Extern | Int | Ext | Int | Ext | Int | Ext |
| **Apnea-hypopnea index (AHI) ≥15: Moderate to severe OSA** | | | | | | | | | | |
| **Classification regression tree (CART) Models** | | | | | | | | | | |
| **Parsimonious model derived from the subgroup** | | | | | | | | | | |
| Female | 0.74 | 0.76 | 0.64 (0.60-0.68) | 0.57 (0.55-0.60) | 0.90 (0.89-0.91) | 0.91 (0.90-0.92) | 6.40 | 6.33 | 0.40 | 0.47 |
| Male | 0.71 | 0.73 | 0.66 (0.63-0.69) | 0.61 (0.59-0.62) | 0.84 (0.82-0.85) | 0.85 (0.84-0.86) | 4.13 | 4.07 | 0.40 | 0.46 |
| Age 30-69 | 0.69 | 0.74 | 0.67 (0.65-0.70) | 0.62 (0.61-0.63) | 0.85 (0.83-0.86) | 0.86 (0.85-0.87) | 4.47 | 4.43 | 0.39 | 0.44 |
| **Parsimonious model derived from the full sample** | | | | | | | | | | |
| Female | ⎯ | 0.77 | ⎯ | 0.58 (0.56-0.60) | ⎯ | 0.90 (0.89-0.91) | ⎯ | 5.80 | ⎯ | 0.47 |
| Male | ⎯ | 0.73 | ⎯ | 0.61 (0.59-0.62) | ⎯ | 0.85 (0.84-0.86) | ⎯ | 4.07 | ⎯ | 0.46 |
| Age 30-69 | ⎯ | 0.75 | ⎯ | 0.60 (0.59-0.62) | ⎯ | 0.87 (0.86-0.88) | ⎯ | 4.62 | ⎯ | 0.46 |
| Physicians registered in ADP | ⎯ | 0.75 | ⎯ | 0.60 (0.59-0.61) | ⎯ | 0.87 (0.87-0.88) | ⎯ | 4.62 | ⎯ | 0.46 |
| Claimed PAP | ⎯ | 0.58 | ⎯ | 0.93 (0.93-0.94) | ⎯ | 0.08 (0.06-0.10) | ⎯ | 1.01 | ⎯ | 0.88 |
| **Logistic Regression Models** | | | | | | | | | | |
| **Parsimonious model derived from the subgroup** | | | | | | | | | | |
| Female | 0.86 | 0.82 | 0.53 (0.49-0.58) | 0.53 (0.51-0.55) | 0.93 (0.92-0.94) | 0.92 (0.91-0.93) | 7.57 | 6.63 | 0.51 | 0.51 |
| Male | 0.81 | 0.77 | 0.64 (0.61-0.67) | 0.59 (0.58-0.61) | 0.85 (0.83-0.87) | 0.85 (0.84-0.86) | 4.27 | 3.93 | 0.42 | 0.48 |
| Age 30-69 | 0.82 | 0.77 | 0.63 (0.60-0.65) | 0.58 (0.57-0.59) | 0.86 (0.85-0.87) | 0.87 (0.86-0.88) | 4.50 | 4.46 | 0.43 | 0.48 |
| **Parsimonious model derived from the full sample** | | | | | | | | | | |
| Female | ⎯ | 0.81 | ⎯ | 0.52 (0.50-0.55) | ⎯ | 0.92 (0.91-0.93) | ⎯ | 6.50 | ⎯ | 0.52 |
| Male | ⎯ | 0.77 | ⎯ | 0.62 (0.61-0.63) | ⎯ | 0.83 (0.81-0.84) | ⎯ | 3.65 | ⎯ | 0.46 |
| Age 30-69 | ⎯ | 0.80 | ⎯ | 0.58 (0.57-0.59) | ⎯ | 0.87 (0.86-0.88) | ⎯ | 4.46 | ⎯ | 0.48 |
| Physicians registered in ADP | ⎯ | 0.81 | ⎯ | 0.59 (0.58-0.61) | ⎯ | 0.87 (0.87-0.88) | ⎯ | 4.54 | ⎯ | 0.47 |
| Claimed PAP | ⎯ | 0.62 | ⎯ | 0.91 (0.90-0.92) | ⎯ | 0.13 (0.11-0.16) | ⎯ | 1.05 | ⎯ | 0.69 |
| Individuals with prevalent hypertension | ⎯ | 0.79 | ⎯ | 0.66 (0.64-0.68) | ⎯ | 0.80 (0.79-0.82) | ⎯ | 3.30 | ⎯ | 0.43 |
|  | | | | | | | | | | |
| **AHI >30: Severe OSA** | | | | | | | | | | |
| **CART Models** | | | | | | | | | | |
| **Parsimonious as derived from the subgroup** | | | | | | | | | | |
| Female | 0.62 | 0.72 | 0.16 (0.11-0.22) | 0.07 (0.05-0.08) | 0.99 (0.99-1.00) | 0.99 (0.99-0.99) | 16.00 | 7.00 | 0.85 | 0.94 |
| Male | 0.62 | 0.65 | 0.10 (0.07-0.13) | 0.04 (0.03-0.05) | 0.99 (0.99-0.99) | 0.99 (0.99-0.99) | 10.00 | 4.00 | 0.91 | 0.97 |
| Age 30-69 | 0.67 | 0.78 | 0.12 (0.09-0.15) | 0.06 (0.05-0.07) | 0.99 (0.99-1.00) | 0.99 (0.99-0.99) | 12.00 | 6.00 | 0.89 | 0.95 |
| **Parsimonious model derived from the full sample** | | | | | | | | | | |
| Female | ⎯ | 0.72 | ⎯ | 0.09 (0.07-0.11) | ⎯ | 0.98 (0.98-0.99) | ⎯ | 4.5 | ⎯ | 0.93 |
| Male | ⎯ | 0.65 | ⎯ | 0.07 (0.06-0.08) | ⎯ | 0.99 (0.98-0.99) | ⎯ | 7.00 | ⎯ | 0.94 |
| Age 30-69 | ⎯ | 0.67 | ⎯ | 0.03 (0.02-0.04) | ⎯ | 0.99 (0.99-1.00) | ⎯ | 3.00 | ⎯ | 0.98 |
| Physicians registered in ADP | ⎯ | 0.67 | ⎯ | 0.07 (0.06-0.08) | ⎯ | 0.99 (0.98-0.99) | ⎯ | 7.00 | ⎯ | 0.94 |
| Claimed PAP | ⎯ | 0.50 | ⎯ | 0.09 (0.08-0.11) | ⎯ | 0.93 (0.92-0.94) | ⎯ | 1.29 | ⎯ | 0.98 |
| **Logistic Regression Models** | | | | | | | | | | |
| **Parsimonious as derived from the subgroup** | | | | | | | | | | |
| Female | 0.85 | 0.83 | 0.15 (0.10-0.21) | 0.08 (0.06-0.10) | 0.99 (0.99-1.00) | 0.99 (0.98-0.99) | 15.00 | 8.00 | 0.86 | 0.93 |
| Male | 0.77 | 0.78 | 0.14 (0.11-0.17) | 0.10 (0.09-0.12) | 0.98 (0.97-0.98) | 0.98 (0.97-0.98) | 7.00 | 5.00 | 0.88 | 0.92 |
| Age 30-69 | 0.81 | 0.81 | 0.11 (0.08-0.14) | 0.11 (0.10-0.12) | 0.98 (0.98-0.99) | 0.98 (0.98-0.98) | 5.50 | 5.50 | 0.91 | 0.91 |
| **Parsimonious model derived from the full sample** | | | | | | | | | | |
| Female | ⎯ | 0.84 | ⎯ | 0.12 (0.10-0.14) | ⎯ | 0.98 (0.97-0.98) | ⎯ | 6.00 | ⎯ | 0.90 |
| Male | ⎯ | 0.78 | ⎯ | 0.09 (0.08-0.10) | ⎯ | 0.98 (0.98-0.99) | ⎯ | 4.50 | ⎯ | 0.93 |
| Age 30-69 | ⎯ | 0.79 | ⎯ | 0.07 (0.06-0.08) | ⎯ | 0.98 (0.98-0.99) | ⎯ | 3.50 | ⎯ | 0.95 |
| Physicians registered in ADP | ⎯ | 0.80 | ⎯ | 0.10 (0.09-0.11) | ⎯ | 0.98 (0.98-0.98) | ⎯ | 5.00 | ⎯ | 0.92 |
| Claimed PAP | ⎯ | 0.51 | ⎯ | 0.15 (0.14-0.17) | ⎯ | 0.87 (0.86-0.89) | ⎯ | 1.15 | ⎯ | 0.98 |
| Individuals with prevalent hypertension | ⎯ | 0.77 | ⎯ | 0.15 (0.13-0.16) | ⎯ | 0.96 (0.95-0.97) | ⎯ | 3.75 | ⎯ | 0.89 |

ADP, assistive device program; AHI, apnea-hypopnea index; OSA, obstructive sleep apnea; PAP, positive airway pressure treatment

*Bootstrap Optimism Corrected for the internal validation (rep=1000)

#Sensitivity, specificity, positive and negative predictive values, and positive and negative likelihood ratios were calculated as based on an estimated probability of 0.5 or greater to classify individuals as having OSA.

**e-Table 13:** Measurement properties associated with different OSA probability threshold for moderate to severe OSA (parsimonious logistic model) on the external cohort.

| **Probability Threshold** | **Sensitivity** | **Specificity** | **Positive Likelihood Ratio** | **Negative Likelihood Ratio** |
| --- | --- | --- | --- | --- |
| **.02** | 1.00 | 0.00 | 1.00 | .00 |
| **.03** | 1.00 | 0.00 | 1.00 | .08 |
| **.04** | 1.00 | 0.01 | 1.01 | .12 |
| **.05** | 1.00 | 0.02 | 1.02 | .08 |
| **.06** | 1.00 | 0.03 | 1.02 | .13 |
| **.07** | 0.99 | 0.04 | 1.04 | .14 |
| **.08** | 0.99 | 0.06 | 1.06 | .16 |
| **.09** | 0.99 | 0.08 | 1.08 | .16 |
| **.10** | 0.98 | 0.11 | 1.10 | .17 |
| **.11** | 0.98 | 0.13 | 1.12 | .18 |
| **.12** | 0.97 | 0.15 | 1.14 | .19 |
| **.13** | 0.97 | 0.17 | 1.17 | .19 |
| **.14** | 0.96 | 0.19 | 1.19 | .20 |
| **.15** | 0.96 | 0.22 | 1.22 | .20 |
| **.16** | 0.95 | 0.25 | 1.27 | .20 |
| **.17** | 0.94 | 0.28 | 1.31 | .21 |
| **.18** | 0.93 | 0.31 | 1.36 | .21 |
| **.19** | 0.92 | 0.34 | 1.41 | .22 |
| **.20** | 0.92 | 0.37 | 1.46 | .22 |
| **.21** | 0.91 | 0.41 | 1.53 | .23 |
| **.22** | 0.89 | 0.44 | 1.61 | .24 |
| **.23** | 0.88 | 0.48 | 1.69 | .24 |
| **.24** | 0.87 | 0.51 | 1.77 | .25 |
| **.25** | 0.86 | 0.54 | 1.86 | .27 |
| **.26** | 0.85 | 0.56 | 1.94 | .27 |
| **.27** | 0.83 | 0.59 | 2.03 | .28 |
| **.28** | 0.82 | 0.61 | 2.11 | .29 |
| **.29** | 0.81 | 0.63 | 2.20 | .31 |
| **.30** | 0.80 | 0.65 | 2.28 | .31 |
| **.31** | 0.78 | 0.67 | 2.40 | .32 |
| **.32** | 0.77 | 0.70 | 2.53 | .33 |
| **.33** | 0.76 | 0.71 | 2.59 | .34 |
| **.34** | 0.74 | 0.73 | 2.71 | .35 |
| **.35** | 0.73 | 0.74 | 2.79 | .36 |
| **.36** | 0.72 | 0.75 | 2.91 | .37 |
| **.37** | 0.71 | 0.76 | 2.98 | .38 |
| **.38** | 0.70 | 0.78 | 3.17 | .39 |
| **.39** | 0.68 | 0.79 | 3.32 | .40 |
| **.40** | 0.68 | 0.80 | 3.42 | .40 |
| **.41** | 0.66 | 0.81 | 3.58 | .41 |
| **.42** | 0.66 | 0.82 | 3.67 | .42 |
| **.43** | 0.65 | 0.83 | 3.90 | .42 |
| **.44** | 0.64 | 0.84 | 4.02 | .43 |
| **.45** | 0.63 | 0.85 | 4.12 | .43 |
| **.46** | 0.62 | 0.85 | 4.26 | .44 |
| **.47** | 0.61 | 0.86 | 4.43 | .45 |
| **.48** | 0.60 | 0.87 | 4.52 | .46 |
| **.49** | 0.59 | 0.87 | 4.66 | .47 |
| **.50** | 0.58 | 0.88 | 4.78 | .47 |
| **.51** | 0.57 | 0.88 | 4.92 | .48 |
| **.52** | 0.56 | 0.89 | 5.04 | .49 |
| **.53** | 0.56 | 0.89 | 5.19 | .50 |
| **.54** | 0.55 | 0.90 | 5.33 | .50 |
| **.55** | 0.53 | 0.90 | 5.42 | .52 |
| **.56** | 0.52 | 0.91 | 5.50 | .53 |
| **.57** | 0.51 | 0.91 | 5.68 | .54 |
| **.58** | 0.50 | 0.91 | 5.72 | .55 |
| **.59** | 0.49 | 0.92 | 5.75 | .56 |
| **.60** | 0.47 | 0.92 | 5.88 | .57 |
| **.61** | 0.46 | 0.92 | 6.09 | .58 |
| **.62** | 0.45 | 0.93 | 6.21 | .59 |
| **.63** | 0.44 | 0.93 | 6.27 | .60 |
| **.64** | 0.43 | 0.93 | 6.37 | .61 |
| **.65** | 0.41 | 0.94 | 6.49 | .63 |
| **.66** | 0.41 | 0.94 | 6.64 | .63 |
| **.67** | 0.39 | 0.94 | 6.76 | .64 |
| **.68** | 0.38 | 0.94 | 6.87 | .65 |
| **.69** | 0.37 | 0.95 | 7.05 | .67 |
| **.70** | 0.36 | 0.95 | 7.23 | .67 |
| **.71** | 0.35 | 0.95 | 7.43 | .68 |
| **.72** | 0.34 | 0.96 | 7.78 | .69 |
| **.73** | 0.33 | 0.96 | 7.99 | .70 |
| **.74** | 0.32 | 0.96 | 8.11 | .71 |
| **.75** | 0.31 | 0.96 | 8.25 | .72 |
| **.76** | 0.29 | 0.97 | 8.47 | .73 |
| **.77** | 0.27 | 0.97 | 8.43 | .75 |
| **.78** | 0.26 | 0.97 | 8.76 | .76 |
| **.79** | 0.25 | 0.97 | 8.88 | .77 |
| **.80** | 0.23 | 0.97 | 8.73 | .79 |
| **.81** | 0.21 | 0.98 | 8.99 | .81 |
| **.82** | 0.19 | 0.98 | 9.06 | .83 |
| **.83** | 0.17 | 0.98 | 9.51 | .84 |
| **.84** | 0.16 | 0.98 | 9.81 | .86 |
| **.85** | 0.14 | 0.99 | 9.99 | .87 |
| **.86** | 0.12 | 0.99 | 11.33 | .89 |
| **.87** | 0.10 | 0.99 | 12.71 | .91 |
| **.88** | 0.08 | 0.99 | 14.24 | .93 |
| **.89** | 0.06 | 1.00 | 14.63 | .94 |
| **.90** | 0.04 | 1.00 | 14.44 | .96 |
| **.91** | 0.02 | 1.00 | 18.08 | .98 |
| **.92** | 0.01 | 1.00 | 49.00 | .99 |
| **.93** | 0.01 | 1.00 | . | .99 |
| **.94** | 0.00 | 1.00 | . | 1.00 |
| **.95** | 0.00 | 1.00 | . | 1.00 |
| **.96** | 0.00 | 1.00 | . | 1.00 |
| **1.00** | 0.00 | 1.00 | . | 1.00 |

**Population with OSA**

Patients with suspected OSA

Diagnostic sleep study (PSG recording)

Therapeutic sleep study (PAP, OA, positional therapy, weight reduction)

- Diagnosed with OSA, but no treatment or other treatment options (no therapeutic study) were prescribed
- Diagnosed with other sleep disorders

Home care provider (PAP);

Dentist (OA)

- Did not attend a study
- Refused to purchase PAP machine
- Therapeutic sleep study was not considered
- Refused follow-up
- Refused PAP machine usage
- Unaware about diagnosis – did not refer to sleep specialist
- Did not attend sleep specialist
- Did not attend diagnostic study in sleep lab

Patients with other sleep disorders

Diagnosed with OSA (sleep clinic visit)

Potential other scenarios

Not able to identify

Physician billing diagnoses of sleep apnea (OHIP)

Health administrative data

Fee code for diagnostic sleep study (OHIP)

Fee code for therapeutic sleep study (OHIP)

PAP claim (ADP)

Not able to identify

Physician billing diagnoses of sleep apnea (from OHIP)

Inpatient hospitalization with sleep apnea (CIHI)

Surgery (CIHI)

**e-Figure 1. Health care pattern for individuals with suspected obstructive sleep apnea.**

Abbreviations: ADP, assistive devices program; PAP, positive airway pressure; OA, oral appliances; OHIP, Ontario Health Insurance Plan; OSA – obstructive sleep apnea; PSG, polysomnography.

**e-Figure 2.** **External validation: calibration plots** to classify individuals with mild to severe OSA regardless or with excessive daytime sleepiness for the parsimonious classification regression tree (CART) or logistic regression model: parsimonious CART model for theAHI≥5; parsimonious logistic regression model for theAHI≥5; full logistic regression model for theAHI≥5 and ESS≥13; and full logistic regression model for theAHI≥5.

**e-References**

1. Iber CA-I, S.; Chesson, A. and Quan, SF for the American Academy of Sleep Medicine. . The AASM Manual for the Scoring of Sleep and Associated Events: Rules, Terminology and Technical Specification, 1st ed.: *Westchester, Illinois: American Academy of Sleep Medicine.* 2007.

2. Berry RB, Budhiraja R, Gottlieb DJ, et al. Rules for scoring respiratory events in sleep: update of the 2007 AASM Manual for the Scoring of Sleep and Associated Events. Deliberations of the Sleep Apnea Definitions Task Force of the American Academy of Sleep Medicine. *J Clin Sleep Med.* 2012;8(5):597-619.

3. Ontario Ministry of Health and Long-Term Care. Health Analyst’s Toolkit. Available from: http://www.health.gov.on.ca/english/providers/pub/healthanalytics/health_toolkit/health_toolkit.pdf. Published 2012. Accessed at Apr 29, 2021.

4. Wilkins R, Tjepkema M, Mustard C, Choiniere R. The Canadian census mortality follow-up study, 1991 through 2001. *Health reports / Statistics Canada, Canadian Centre for Health Information = Rapports sur la sante / Statistique Canada, Centre canadien d'information sur la sante.* 2008;19(3):25-43.

5. Wilkins R. Use of postal codes and addresses in the analysis of health data. *Health reports / Statistics Canada, Canadian Centre for Health Information = Rapports sur la sante / Statistique Canada, Centre canadien d'information sur la sante.* 1993;5(2):157-177.

6. Southern DA, Faris PD, Knudtson ML, Ghali WA. Prognostic relevance of census-derived individual respondent incomes versus household incomes. *Canadian journal of public health = Revue canadienne de sante publique.* 2006;97(2):114-117.

7. Gershon A WC, Vasilevska-Ristovska J, Guan J, Cicutto L, To T. Identifying patients diagnosed with asthma using health administrative data. *Canadian Respiratory Journal.* 2009;16:183–188.

8. Yeung DF, Boom NK, Guo H, Lee DS, Schultz SE, Tu JV. Trends in the incidence and outcomes of heart failure in Ontario, Canada: 1997 to 2007. *CMAJ : Canadian Medical Association journal = journal de l'Association medicale canadienne.* 2012;184(14):E765-773.

9. Gershon AS, Wang C, Guan J, Vasilevska-Ristovska J, Cicutto L, To T. Identifying individuals with physcian diagnosed COPD in health administrative databases. *Copd.* 2009;6(5):388-394.

10. Lipscombe LL, Hux JE. Trends in diabetes prevalence, incidence, and mortality in Ontario, Canada 1995-2005: a population-based study. *Lancet.* 2007;369(9563):750-756.

11. Tu K, Campbell NR, Chen ZL, Cauch-Dudek KJ, McAlister FA. Accuracy of administrative databases in identifying patients with hypertension. *Open medicine : a peer-reviewed, independent, open-access journal.* 2007;1(1):e18-26.

12. Tu JV, Austin PC, Walld R, Roos L, Agras J, McDonald KM. Development and validation of the Ontario acute myocardial infarction mortality prediction rules. *Journal of the American College of Cardiology.* 2001;37(4):992-997.

13. Assistive Devices Program. Continuous/Autotitrating/BiLevel Positive Pressure Systems. Accessed July 30, 2016, 2016.

14. Austin PC, Stanbrook MB, Anderson GM, Newman A, Gershon AS. Comparative ability of comorbidity classification methods for administrative data to predict outcomes in patients with chronic obstructive pulmonary disease. *Annals of epidemiology.* 2012;22(12):881-887.

15. Cowling TE, Cromwell DA, Sharples LD, van der Meulen J. A novel approach selected small sets of diagnosis codes with high prediction performance in large healthcare datasets. *Journal of Clinical Epidemiology.* 2020;128:20-28.

16. Austin PC, Steyerberg EW. The Integrated Calibration Index (ICI) and related metrics for quantifying the calibration of logistic regression models. *Statistics in Medicine.* 2019;38(21):4051-4065.
